# Supplementary material
Source: PubMed Central journal article supplement (PMC2518969)

# Two Palladium-Catalyzed Domino Reactions from One Set of Substrates/ Reagents: Efficient Synthesis of Substituted Indenes and *cis*-Stilbenoid Hydrocarbons from the Same Internal Alkynes and Hindered Grignard Reagents

Cheng-Guo Dong, Pik Yeung and Qiao-Sheng Hu\*

*Department of Chemistry, College of Staten Island and the Graduate Center of the City  
University of New York, Staten Island, New York 10314*

## Supporting Information

**General:** NMR spectra were recorded on Varian 200 MHz or 600 MHz spectrometers. Chemical shifts were reported in ppm down field from internal tetramethylsilane. All yields reported refer to isolated yields (average of two runs) unless otherwise indicated, and the product purity was estimated to be greater than 95% as determined by <sup>1</sup>H NMR. Melting points were measured on a Fisher-Johns Melting Point Apparatus and uncorrected. Elemental analyses were performed by Atlantic Microlab, Inc. THF was distilled from sodium/benzophenone ketyl. 2,6-Dimethylphenylmagnesium bromide, 2-mesitylmagnesium bromide, 1-phenyl-1-propyne, 3-hexyne, 1,2-dibromomethane, anhydrous iron(III) chloride were purchased from Aldrich and used directly. Pd(OAc)<sub>2</sub> was a gift from Frontier Scientific, Inc. PPh<sub>3</sub> was purchased from Acros Organics and used directly. Anhydrous copper(II) chloride, Anhydrous copper(II) sulfate, silver carbonate, and Iron(III) chloride were purchased from Stem Chemical Inc. and were used as received. Other chemical reagents were purchased from Alfa Aesar and used without further purification. Bromopentamethylbenzene, pentamethylphenylmagnesium bromide were prepared according to reported methods.<sup>1,2</sup> 2-Bromo-1-ethyl-3-methylbenzene, 2-bromo-1,3-diethylbenzene and 2-bromo-1-isopropyl-3-methylbenzene were prepared according to literature procedures.<sup>3</sup> 1,2-Bis(4-methoxyphenyl)acetylene and 4-(1-Hexyn-1-yl)methylbenzene was prepared according to reported method.<sup>4</sup>

### General Procedures for Pd(OAc)<sub>2</sub>-Promoted Domino Reaction of Diphenylacetylene with Mesitylmagnesium Bromide:

- A. In glove box with nitrogen atmosphere, to a mixture of diphenylacetylene (44.5 mg, 0.25 mmol) and 0.5 ml THF (in a schlenk flask) was added palladium acetate (56 mg, 0.25 mmol). After stirred for 5-10 minutes, Grignard reagent (0.65 mL, 1M in THF, 0.65 mmol) was added. The mixture was allowed to stir at room temperature or 60°C (oil bath) or refluxing for 20 hours. After quenched with water, the reaction mixture was extracted with ethyl acetate (15 mL x 3). The organic layer was washed with brine and the solvent was evaporated under vacuum. The reaction mixtures were analyzed by <sup>1</sup>H NMR, from which the reaction conversion and the ratios of cyclization product : cross-coupling product : self-coupling product were be obtained.
- B. In glove box with nitrogen atmosphere, to a mixture of diphenylacetylene (44.5 mg, 0.25 mmol) and 0.5 mL THF (in a schlenk flask) was added palladium acetate (56 mg, 0.25

mmol) and PPh<sub>3</sub> (2 equiv., 131 mg, 0.5 mmol, or 4 equiv., 262 mg, 1.0 mmol). After stirred for 5-10 minutes, Grignard reagent (1.0 mL, 1M in THF, 1.0 mmol) was added. The mixture was allowed to stir under room temperature or 60°C (oil bath) or refluxing for 20 hours. After quenched with water, the reaction mixture was extracted with ethyl acetate (15 mL x 3). The organic layer was washed with brine and the solvent was evaporated under vacuum. The reaction mixtures were analyzed by <sup>1</sup>H NMR, from which the reaction conversion and the ratios of cyclization product: cross-coupling product : self-coupling product were be obtained.

### **General Procedure of the Oxidant Screening for Pd(OAc)<sub>2</sub>-Catalyzed Domino Reaction of Diphenylacetylene with Mesitylmagnesium Bromide:**

In glove box with nitrogen atmosphere, to a mixture of diphenylacetylene (89 mg, 0.5 mmol), oxidant (0.5 mmol) and 0.5 mL THF (in a Schlenk flask) was added palladium acetate (3.4 mg, 0.015 mmol). After stirred for 5-10 minutes, Grignard reagent (1.25 mL, 1M in THF, 1.25 mmol) was added. The mixture was allowed to stir under 60°C (oil bath) for 20 hours. After quenched with water, the reaction mixture was extracted with ethyl acetate (15 mL x 3). The organic layer was washed with brine and the solvent was evaporated under vacuum. The crude reaction mixtures were analyzed by <sup>1</sup>H NMR. Flash chromatography on silica gel (hexane: ethyl acetate = 100: 0 to 90: 10) gave the cyclization products.

### **General Procedure for Pd(OAc)<sub>2</sub>-Catalyzed Annulative Domino Reaction of Internal Alkynes with Hindered Grignard Reagents:**

In glove box with nitrogen atmosphere, to a mixture of alkyne (0.5 mmol), 1,2-dibromoethane (0.75 mmol, 65 µl) and 0.5 mL THF (in a schlenk flask) was added palladium acetate (3.4 mg, 0.015 mmol). After stirred for 5-10 minutes, Grignard reagent (1.25 mL, 1M in THF, 1.25 mmol) was added. The mixture was allowed to stir under 60°C (oil bath) for 20 hours. After quenched with water, the reaction mixture was extracted with ethyl acetate (15 mL x 3). The organic layer was washed with brine and the solvent was evaporated under vacuum. Flash chromatography on silica gel (hexane: ethyl acetate = 100: 0 to 90: 10) gave the cyclization products.

**4,6-Dimethyl-2,3-diphenyl-1H-indene (1):** white solid. m. p.: 86-87°C. <sup>1</sup>H NMR (CDCl<sub>3</sub>, 600 MHz): δ 7.403~7.345 (m, 3H), 7.313 (d, J= 7.2 Hz, 2H), 7.209 (s, 1H), 7.178 (d, J= 8.4 Hz, 2H), 7.139 (t, J= 7.2 Hz, 2H), 7.097 (t, J=7.2 Hz, 1H), 6.819 (s, 1H), 3.861 (s, 2H), 2.368 (s, 3H), 1.808 (s, 3H). <sup>13</sup>C NMR (CDCl<sub>3</sub>, 150 MHz): δ 143.118, 141.612, 141.367, 140.054, 139.278, 136.729, 134.756, 131.576, 130.386, 129.620, 128.560, 127.998, 127.851, 127.159, 126.457, 122.188, 40.595, 21.168, 19.834. Anal. calcd. for C<sub>23</sub>H<sub>20</sub>: C, 93.20%; H, 6.80%. Found: C, 93.00%; H, 6.69%.

**4-Methyl-2,3-diphenyl-1H-indene (2):** light yellow solid. M. p.: 118-119°C. <sup>1</sup>H NMR (CDCl<sub>3</sub>, 600 MHz): δ 7.412~ 7.367 (m, 4H), 7.325 (d, J= 7.8 Hz, 2H), 7.194 (d, J= 7.8 Hz, 2H), 7.160 (d, J= 7.8 Hz, 2H), 7.127 (t, J= 7.8 Hz, 2H), 6.992 (d, J= 7.8 Hz, 1H), 3.905 (s, 2H), 1.848 (s, 3H). <sup>13</sup>C NMR (CDCl<sub>3</sub>, 150 MHz): δ 144.101, 142.721, 141.478, 141.152, 139.137, 136.584, 131.940, 129.669, 129.553, 128.563, 128.022, 127.969, 127.225, 126.639, 124.933, 121.334, 40.844, 20.012. Anal. calcd. for C<sub>22</sub>H<sub>18</sub>: C, 93.57%; H, 6.43%. Found: C, 93.35%; H, 6.47%.

**4,5,6,7-Tetramethyl-2,3-diphenyl-1H-indene (3):** off-white solid. M. p.: 139-141°C. <sup>1</sup>H NMR (CDCl<sub>3</sub>, 600 MHz): δ 7.383 (t, J= 7.2 Hz, 2H), 7.345 (t, J= 7.2 Hz, 1H), 7.292 (d, J=7.2 Hz, 1H), 7.160 (d, J= 7.8 Hz, 2H), 7.134 (t, J= 7.8 Hz, 2H), 7.090 (t, J=7.8 Hz, 1H), 3.795 (s, 2H), 2.377 (s, 3H), 2.299 (s, 3H), 2.194 (s, 3H), 1.795 (s, 3H). <sup>13</sup>C NMR (CDCl<sub>3</sub>, 150 MHz): δ 142.156, 141.415, 140.474, 139.912, 139.147, 137.132, 134.573, 132.119, 129.676, 128.636, 128.205, 128.026, 127.906, 127.011, 126.319, 40.573, 16.368, 16.227, 16.119, 16.048. Anal. calcd. for C<sub>25</sub>H<sub>24</sub>: C, 92.54%; H, 7.46%. Found: C, 92.33%; H, 7.45%.

**6-Methoxy-4-methyl-2,3-diphenyl-1H-indene (4):** white solid. M. p.: 108-109°C. <sup>1</sup>H NMR (CDCl<sub>3</sub>, 600 MHz): δ 7.387 (t, J= 7.8 Hz, 2H), 7.361 (t, J= 7.2 Hz, 1H), 7.317 (d, J= 7.8 Hz, 2H), 7.167~ 7.121 (m, 4H), 7.087 (t, J= 7.2 Hz, 1H), 6.980 (d, J= 1.8 Hz, 1H), 6.560 (d, J= 1.8 Hz, 1H), 3.867 (s, 2H), 3.836 (s, 3H), 1.813 (s, 3H). <sup>13</sup>C NMR (CDCl<sub>3</sub>, 150 MHz): δ 157.782, 144.656, 141.132, 139.239, 138.843, 137.561, 136.743, 132.815, 129.592, 128.585, 127.995, 127.686, 127.177, 126.275, 115.188, 107.412, 55.463, 40.813, 20.069. Anal. calcd. for C<sub>23</sub>H<sub>20</sub>O: C, 88.43%; H, 6.45%. Found: C, 88.34%; H, 6.34%.

**2,3-Bis(4-methoxyphenyl)-4,6-dimethyl-1H-indene (5):** yellow solid. M. p.: 116-118°C. <sup>1</sup>H NMR (CDCl<sub>3</sub>, 600 MHz): δ 7.211 (d, J= 9.0 Hz, 2H), 7.179 (s, 1H), 7.139 (d, J= 9.0 Hz, 2H), 6.948 (d, J= 8.4 Hz, 2H), 6.802 (s, 1H), 6.703 (d, J= 8.4 Hz, 2H), 3.868 (s, 3H), 3.807 (s, 2H), 3.745 (s, 3H), 2.359 (s, 3H), 1.831 (s, 3H). <sup>13</sup>C NMR (CDCl<sub>3</sub>, 150 MHz): δ 158.670, 158.066, 142.778, 142.009, 139.741, 139.422, 134.233, 131.572, 131.182, 130.691, 130.301, 129.497, 128.890, 122.076, 114.012, 113.419, 55.115, 55.068, 40.419, 21.115, 19.875. Anal. calcd. for C<sub>25</sub>H<sub>24</sub>O<sub>2</sub>: C, 84.24%; H, 6.79%. Found: C, 83.89%; H, 6.81%.

**2,3-bis(4-methoxyphenyl)-4-methyl-1H-indene (6):** white solid. M. p.: 131-132°C. <sup>1</sup>H NMR (CDCl<sub>3</sub>, 600 MHz): δ 7.354 (d, J= 7.8 Hz, 1H), 7.221 (d, J= 9.0 Hz, 2H), 7.152 (d, J= 8.4 Hz, 2H), 7.089 (t, J= 7.8 Hz, 1H), 6.971 (d, J= 7.2 Hz, 1H), 6.952 (d, J= 9.0 Hz, 2H), 6.710 (d, J= 8.4 Hz, 2H), 3.871 (s, 3H), 3.845 (s, 2H), 3.749 (s, 3H), 1.868 (s, 3H). <sup>13</sup>C NMR (CDCl<sub>3</sub>, 150 MHz): δ 158.742, 158.226, 144.545, 142.407, 140.859, 139.577, 131.580, 131.457, 130.766, 129.499, 129.362, 129.049, 124.506, 121.210, 114.041, 113.466, 55.162, 55.113, 40.667, 20.056. Anal. calcd. for C<sub>24</sub>H<sub>22</sub>O<sub>2</sub>: C, 84.18%; H, 6.48%. Found: C, 83.84%; H, 6.38%.

**2,3-Diethyl-4,6-dimethyl-1H-indene (7):** colorless liquid. <sup>1</sup>H NMR (CDCl<sub>3</sub>, 200 MHz): δ 7.056 (s, 1H), 6.825 (s, 1H), 3.217 (s, 2H), 2.640 (q, J= 7.6 Hz, 2H), 2.537 (s, 3H), 2.438 (q, J= 7.6 Hz, 2H), 2.320 (s, 3H), 1.130 (t, J= 7.6 Hz, 3H), 1.127 (t, J= 7.6 Hz, 3H). <sup>13</sup>C NMR (CDCl<sub>3</sub>, 150 MHz): δ 143.869, 143.233, 141.288, 139.182, 132.951, 129.939, 129.173, 122.138, 39.376, 21.261, 20.970, 19.889, 19.590, 15.290, 14.644.

**2,3-Diethyl-4-methyl-1H-indene (8):** colorless liquid. <sup>1</sup>H NMR (CDCl<sub>3</sub>, 200 MHz): δ 7.230 (t, J= 3.6 Hz, 1H), 7.004 (d, J= 3.6 Hz, 1H), 7.699 (d, J=3.6 Hz, 1H), 3.256 (s, 2H), 2.667 (q, J= 7.2 Hz, 2H), 2.582 (s, 3H), 2.462 (q, J=7.2 Hz, 2H), 1.144 (t, J= 7.2 Hz, 6H). <sup>13</sup>C NMR (CDCl<sub>3</sub>, 150 MHz): δ 144.397, 143.993, 143.470, 139.447, 129.575, 129.175, 123.400, 121.185, 39.575, 21.298, 19.901, 19.750, 15.320, 14.625.

**3-Butyl-4,6-dimethyl-2-*p*-tolyl-1H-indene/2-butyl-4,6-dimethyl-3-*p*-tolyl-1H-indene (9):** <sup>1</sup>H NMR showed a 91: 9 ratio. Analytic sample of 3-butyl-4,6-dimethyl-2-*p*-tolyl-1H-indene was obtained by recrystallization of the mixture of 3-butyl-4,6-dimethyl-2-*p*-tolyl-1H-indene and 2-butyl-4,6-dimethyl-3-*p*-tolyl-1H-indene in hexanes. white solid. M. p.: 81-82°C. <sup>1</sup>H NMR (CDCl<sub>3</sub>, 600 MHz): δ 7.276 (d, J= 7.8 Hz, 2H), 7.204 (d, J= 7.8 Hz, 2H), 7.127 (s, 1H), 6.890 (s, 1H), 3.600 (s, 2H), 2.733 (t, J= 7.8 Hz, 2H), 2.583 (s, 3H), 2.382 (s, 3H), 2.352 (s, 3H), 1.604

(m, 2H), 1.375 (m, 2H), 0.894 (t, J = 7.2 Hz, 3H).  $^{13}\text{C}$  NMR ( $\text{CDCl}_3$ , 150 MHz):  $\delta$  144.160, 141.320, 140.432, 140.397, 136.163, 135.401, 133.986, 130.434, 130.300, 128.973, 128.267, 122.222, 41.700, 33.074, 27.482, 22.795, 21.166, 21.051, 19.720, 13.889. The structure of 3-butyl-4,6-dimethyl-2-*p*-tolyl-1H-indene was established by NOE effect: NOE effect observed when irradiated at the peak at  $\delta$  3.600 ppm: 7.276 (d, 0.60%), 7.127 (s, 0.65%). Anal. calcd. for  $\text{C}_{22}\text{H}_{26}$ : C, 90.98%; H, 9.02%. Found: C, 90.74%; H, 9.05%.

**3,4,6-Trimethyl-2-phenyl-1H-indene (10):**  $^1\text{H}$  NMR showed a 92: 8 ratio. Analytic sample of 3,4,6-trimethyl-2-phenyl-1H-indene was obtained by recrystallization of the mixture of 3,4,6-trimethyl-2-phenyl-1H-indene and 2,4,6-trimethyl-3-phenyl-1H-indene in hexanes. White solid. m.p.: 108-110°C.  $^1\text{H}$  NMR ( $\text{CDCl}_3$ , 600 MHz)  $\delta$  7.414 ~ 7.389 (m, 4H), 7.271 (t, J = 6.6 Hz, 1H), 7.130 (s, 1H), 6.881 (s, 1H), 3.633 (s, 3H), 2.618 (s, 3H), 2.419 (s, 3H), 2.357 (s, 3H).  $^{13}\text{C}$  NMR ( $\text{CDCl}_3$ , 150 MHz)  $\delta$  143.6, 142.0, 140.2, 138.0, 136.0, 134.3, 130.9, 130.2, 128.6, 128.2, 126.4, 122.2, 41.2, 21.1, 20.3, 15.6. The structure of 3,4,6-trimethyl-2-phenyl-1H-indene was established by NOE effect: NOE effect observed when irradiated at the peak at  $\delta$  3.633 ppm: 7.400~7.390 (m, 0.9%), 7.130 (s, 0.65%).

**3,4-Dimethyl-2-phenyl-1H-indene (11):**  $^1\text{H}$  NMR showed a 90: 10 ratio. Analytic sample of 3,4-dimethyl-2-phenyl-1H-indene was obtained by recrystallization of the mixture of 3,4-dimethyl-2-phenyl-1H-indene and 2,4-dimethyl-3-phenyl-1H-indene in hexanes. White solid. m.p.: 75-77°C.  $^1\text{H}$  NMR ( $\text{CDCl}_3$ , 600 MHz)  $\delta$  7.426 ~ 7.390 (m, 4H), 7.311 (d, J = 7.2 Hz, 1H), 7.282 (d, J = 7.2 Hz, 1H), 7.093 (t, J = 7.2 Hz, 1H), 7.058 (d, J = 7.2 Hz, 1H), 3.674 (s, 2H), 2.665 (s, 3H), 2.440 (s, 3H).  $^{13}\text{C}$  NMR ( $\text{CDCl}_3$ , 150 MHz)  $\delta$  144.6, 143.3, 141.3, 137.9, 136.2, 131.3, 129.4, 128.6, 128.3, 126.6, 124.6, 121.4, 41.4, 20.4, 15.6. The structure of 3,4-dimethyl-2-phenyl-1H-indene was established by NOE effect: NOE effect observed when irradiated at the peak at  $\delta$  3.674 ppm: 7.421~7.410 (m, 0.8%), 7.311 (d, 0.6%).

**3-Ethyl-4-methyl-2-phenyl-1H-indene (12):**  $^1\text{H}$  NMR showed a 89: 11 ratio. Analytic sample of 3-ethyl-4-methyl-2-phenyl-1H-indene was obtained by recrystallization of the mixture of 3-ethyl-4-methyl-2-phenyl-1H-indene and 2-ethyl-4-methyl-3-phenyl-1H-indene in hexanes. White solid. m. p.: 46-47°C.  $^1\text{H}$  NMR ( $\text{CDCl}_3$ , 600 MHz)  $\delta$  7.405 ~ 7.397 (m, 4H), 7.316 (d, J = 6.6 Hz, 1H), 7.297 (m, 1H), 7.103 (t, J = 7.2 Hz, 1H), 7.074 (d, J = 7.2 Hz, 1H), 3.659 (s, 2H), 2.789 (q, J = 7.2 Hz, 2H), 2.654 (s, 3H), 1.269 (t, J = 7.2 Hz, 3H).  $^{13}\text{C}$  NMR ( $\text{CDCl}_3$ , 150 MHz)  $\delta$  143.8, 143.6, 142.4, 141.2, 138.1, 130.8, 129.6, 128.4, 128.3, 126.7, 124.5, 121.4, 41.9, 20.6, 19.8, 15.6.

**3,4-Diethyl-2-phenyl-1H-indene (13):**  $^1\text{H}$  NMR showed a 85: 15 ratio. Analytic sample of 3,4-diethyl-2-phenyl-1H-indene was obtained by recrystallization of the mixture of 3,4-diethyl-2-phenyl-1H-indene and 2,4-diethyl-3-phenyl-1H-indene in hexanes. White solid. m. p.: 65-66°C.  $^1\text{H}$  NMR ( $\text{CDCl}_3$ , 600 MHz)  $\delta$  7.425 ~ 7.389 (m, 4H), 7.323 (d, J = 7.8 Hz, 1H), 7.307 ~ 7.292 (m, 1H), 7.161 (t, J = 7.8 Hz, 1H), 7.144 (d, J = 7.2 Hz, 1H), 3.661 (s, 2H), 2.977 (q, J = 7.8 Hz, 2H), 2.768 (q, J = 7.2 Hz, 2H), 1.300 (t, J = 7.2 Hz, 3H), 1.261 (t, J = 7.8 Hz, 3H).  $^{13}\text{C}$  NMR ( $\text{CDCl}_3$ , 150 MHz)  $\delta$  144.0, 142.4, 142.1, 141.6, 138.2, 137.7, 128.4, 128.3, 127.8, 126.7, 124.7, 121.3, 42.0, 25.5, 20.6, 17.1, 15.6. The structure of 3,4-diethyl-2-phenyl-1H-indene was established by NOE effect: NOE effect observed when irradiated at the peak at  $\delta$  3.661 ppm: 7.412~7.400 (m, 0.6%), 7.323 (d, 0.3%).

**4-Ethyl-2,3-diphenyl-1H-indene (14):** Off-white solid. m. p.: 80-81°C. <sup>1</sup>H NMR (CDCl<sub>3</sub>, 600 MHz) δ 7.403 ~ 7.365 (m, 4H), 7.344 (d, J = 7.8 Hz, 1H), 7.341 (d, J = 7.8 Hz, 1H), 7.181 (t, J = 7.2 Hz, 2H), 7.156 ~ 7.140 (m, 3H), 7.130 ~ 7.108 (m, 1H), 7.069 (d, J = 7.8 Hz, 1H), 3.902 (s, 2H), 2.216 (q, J = 7.2 Hz, 2H), 0.872 (t, J = 7.2 Hz, 3H). <sup>13</sup>C NMR (CDCl<sub>3</sub>, 150 MHz) δ 143.4, 143.0, 141.5, 141.3, 139.2, 138.6, 136.6, 129.5, 128.5, 128.1, 128.0, 127.9, 127.3, 126.6, 125.1, 121.2, 41.0, 25.0, 16.3.

**4-Isopropyl-2,3-diphenyl-1H-indene (15):** White solid. m. p.: 79-80°C. <sup>1</sup>H NMR (CDCl<sub>3</sub>, 600 MHz): δ 7.400 ~ 7.358 (m, 4H), 7.337 ~ 7.323 (m, 2H), 7.238 ~ 7.221 (m, 2H), 7.144 ~ 7.137 (m, 4H), 7.120 ~ 7.097 (m, 1H), 3.895 (s, 2H), 2.739 (m, J = 6.6 Hz, 1H), 0.961 (d, J = 6.6 Hz, 6H). <sup>13</sup>C NMR (CDCl<sub>3</sub>, 150 MHz): δ 143.7, 142.9, 142.8, 141.6, 141.3, 139.5, 136.7, 129.3, 128.6, 128.1, 127.9, 127.3, 126.6, 125.3, 124.2, 121.1, 41.0, 26.8, 24.1.

### General Procedure for Pd(OAc)<sub>2</sub>-Catalyzed Domino Carbopalladation-Cross-Coupling Reactions of Internal Alkynes with Hindered Grignard Reagents:

In glove box with nitrogen atmosphere, to a mixture of alkyne (0.5 mmol), 1,2-dibromoethane (1.5 mmol, 130 μl and 0.5 mL THF (in a schlenk flask) was added palladium acetate (3.4 mg, 0.015 mmol) and PPh<sub>3</sub> (26.2 mg, 0.1 mmol). After stirred for 5-10 minutes, Grignard reagent (2.0 mL, 1M in THF, 2.0 mmol) was added. The mixture was allowed to stir under refluxing for 20 hours. After quenched with water, the reaction mixture was extracted with ethyl acetate (15 mL x 3). The organic layer was washed with brine and the solvent was evaporated under vacuum. Flash chromatography on silica gel (hexane: ethyl acetate = 100: 0 to 90: 10) gave the cross-coupling products.

**1,2-Bis(2,4,6-trimethylphenyl)stilbene (16):** white solid. M. p.: 177-178.5°C. <sup>1</sup>H NMR (CDCl<sub>3</sub>, 600 MHz): δ 7.047~ 7.025 (m, 6H), 6.928~ 6.911 (m, 4H), 6.641 (s, 4H), 2.167 (s, 6H), 2.052 (s, 12H). <sup>13</sup>C NMR (CDCl<sub>3</sub>, 150 MHz): δ 142.812, 140.323, 138.228, 136.729, 135.893, 131.150, 128.595, 127.152, 125.828, 21.722, 20.890. Anal. calcd. for C<sub>32</sub>H<sub>32</sub>: C, 92.26%; H, 7.74%. Found: C, 92.22%; H, 7.78%.

**1,2-Bis(pentamethylphenyl)stilbene (17):**<sup>5</sup> white solid. m.p.: 252-254°C. <sup>1</sup>H NMR (CDCl<sub>3</sub>, 600 MHz): δ 7.057~ 7.027 (m, 6H), 7.000~ 6.987 (m, 4H), 2.110 (s, 12H), 2.105 (s, 6H), 2.009 (s, 12H). <sup>13</sup>C NMR (CDCl<sub>3</sub>, 150 MHz): δ 143.304, 141.545, 138.971, 132.803, 131.806, 131.761, 130.929, 127.176, 125.656, 20.026, 16.631, 16.413.

**1,2-Bis(2,6-dimethylphenyl)-1,2-bis(4-methoxyphenyl)ethylene (18):** white solid. M. p.: 204-206°C. <sup>1</sup>H NMR (CDCl<sub>3</sub>, 600 MHz): δ 6.918 (t, J= 7.2 Hz, 2H), 6.873 (d, J= 9.0 Hz, 4H), 6.800 (d, J= 7.2 Hz, 4H), 6.621 (d, J= 9.0 Hz, 4H), 3.748 (s, 6H), 2.080 (s, 12H). <sup>13</sup>C NMR (CDCl<sub>3</sub>, 150 MHz): δ 157.589, 141.201, 138.863, 136.904, 135.054, 132.133, 127.587, 126.457, 112.713, 55.076, 21.782. Anal. calcd. for C<sub>32</sub>H<sub>32</sub>O<sub>2</sub>: C, 85.68%; H, 7.19%. Found: C, 85.38%; H, 7.16%.

**1,2-Bis(2,4,6-trimethylphenyl)-1,2-bis(4-methoxyphenyl)ethylene (19):** white solid. M. p.: 195.5-196.5°C. <sup>1</sup>H NMR (CDCl<sub>3</sub>, 600 MHz): δ 6.838 (d, J= 9.0 Hz, 4H), 6.627 (s, 4H), 6.598 (d, J= 9.0 Hz, 4H), 3.737 (s, 6H), 2.161 (s, 6H), 2.029 (s, 12H). <sup>13</sup>C NMR (CDCl<sub>3</sub>, 50 MHz): δ 157.434, 138.892, 138.573, 136.715, 135.646, 135.585, 132.165, 128.540, 112.645, 55.079, 21.711, 20.900. Anal. calcd. for C<sub>34</sub>H<sub>36</sub>O<sub>2</sub>: C, 85.67%; H, 7.61%. Found: C, 85.79%; H, 7.64%.

**3,4-Bis(2,4,6-trimethylphenyl)hex-3-ene (20):**<sup>5</sup> white solid. M. p.: 165-166°C. <sup>1</sup>H NMR (CDCl<sub>3</sub>, 600 MHz): δ 6.648 (s, 4H), 2.472 (q, J= 7.2 Hz, 4H), 2.154 (s, 6H), 2.064 (s, 12H), 1.016 (t, J= 7.2 Hz, 6H). <sup>13</sup>C NMR (CDCl<sub>3</sub>, 150 MHz): δ 138.615, 138.471, 135.697, 134.880, 128.083, 28.228, 20.926, 20.803, 13.382.

**3,4-Bis(pentamethylphenyl)hex-3-ene (21):**<sup>5</sup> white solid. M. p.: 175-177°C. <sup>1</sup>H NMR (CDCl<sub>3</sub>, 600 MHz): δ 2.498 (q, J= 7.2 Hz, 4H), 2.112 (s, 6H), 2.025 (s, 12H), 2.004 (s, 12H), 1.059 (t, J= 7.2 Hz, 6H). <sup>13</sup>C NMR (CDCl<sub>3</sub>, 150 MHz): δ 139.449, 139.330, 131.965, 131.600, 131.112, 29.343, 19.647, 16.544, 16.442, 13.272.

**1,2-Bis(2,6-dimethylphenyl)prop-1-ene (22):** white solid. m.p.: 120-121°C. <sup>1</sup>H NMR (CDCl<sub>3</sub>, 600 MHz): δ 7.295 (d, J= 4.2 Hz, 4H), 7.192 (q, J= 4.2 Hz, 1H), 6.929 (t, J= 7.8 Hz, 1H), 6.890 (t, J= 7.8 Hz, 1H), 6.852 (d, J= 7.8 Hz, 2H), 6.774 (d, J= 7.8 Hz, 2H), 2.216 (s, 3H), 2.202 (s, 6H), 2.084 (s, 6H). <sup>13</sup>C NMR (CDCl<sub>3</sub>, 150 MHz): δ 141.991, 141.966, 140.920, 137.862, 136.641, 135.777, 135.257, 130.090, 127.404, 127.383, 127.355, 126.316, 126.102, 126.032, 22.750, 21.778, 21.068. The stereochemistry of 1,2-bis(dimethylphenyl)prop-1-ene was established by NOE effect: NOE effect observed when irradiated at the peak at δ 2.084 ppm: 7.295 (d, 0.33%), 6.774 (d, 0.32%), 2.202 (s, 0.75%). Anal. calcd. for C<sub>25</sub>H<sub>26</sub>: C, 91.97%; H, 8.03%. Found: C, 91.41%; H, 7.94%.

**1,2-Bis(2,4,6-trimethylphenyl)prop-1-ene (23):** white solid. M. p.: 133-135°C. <sup>1</sup>H NMR (CDCl<sub>3</sub>, 600 MHz): δ 7.275~7.259 (m, 4H), 7.181~7.153 (m, 1H), 6.682 (s, 2H), 6.598 (s, 2H), 2.173 (s, 3H), 2.165 (s, 3H), 2.162 (s, 6H), 2.132 (s, 3H), 2.041 (s, 6H). <sup>13</sup>C NMR (CDCl<sub>3</sub>, 150 MHz): δ 142.475, 139.287, 138.273, 137.883, 136.416, 135.686, 135.454, 135.296, 135.106, 130.086, 128.320, 128.306, 127.292, 125.842, 23.020, 21.697, 20.988, 20.837, 20.819. Anal. calcd. for C<sub>27</sub>H<sub>30</sub>: C, 91.47%; H, 8.53%. Found: C, 91.58%; H, 8.52%.

**1,2-Bis(pentamethylphenyl)prop-1-ene (24):** white solid. M. p.: 177-179 °C. <sup>1</sup>H NMR (CDCl<sub>3</sub>, 600 MHz): δ 7.329 (d, J= 7.2 Hz, 2H), 7.275 (t, J= 7.2 Hz, 2H), 7.156 (t, J= 7.2 Hz, 1H), 2.219 (s, 3H), 2.123(s, 6H), 2.118 (s, 3H), 2.085 (s, 3H), 2.073 (s, 6H), 2.053 (s, 6H), 1.996 (s, 6H). <sup>13</sup>C NMR (CDCl<sub>3</sub>, 150 MHz): δ 143.063, 140.114, 138.966, 138.927, 137.112, 132.447, 132.362, 131.962, 131.716, 131.615, 130.375, 129.933, 127.307, 125.598, 24.145, 20.062, 19.641, 16.611, 16.513, 16.453, 16.380. The stereochemistry of 1,2-bis(pentamethylphenyl)prop-1-ene was established by NOE effect: NOE effect observed when irradiated at the peak at δ 2.219 ppm: 7.329 (d, 0.7%), 2.123 (s, 1.0%).

## Reference:

1. Miller, A.R.; Curtin D.Y. *J. Am. Chem. Soc.* **1976**, 98, 1860-1865.
2. Hawkins, R. T.; Lennarz, W. J.; Snyder, H. R. *J. Am. Chem. Soc.* **1960**, 82, 3053-3059.
3. Furniss, B.S.; Hannaford, A. J.; Smith, P.W.G.; Tatchell, A.R. *Vogel's Textbook of Practical Organic Chemistry* (5<sup>th</sup> ed.), **1989**, P933-935.
4. Sonogashira, K.; Tohda, Y.; Hagihara, N. *Tetrahedron Lett.* **1975**, 4467.
5. Rathore, R.; Deselnicu, M. I.; Burns, C. L. *J. Am. Chem. Soc.* **2002**, 124, 14832-14833.

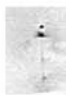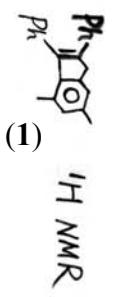

Dong\_PIV\_102\_1H  
 exp1 s2pu1

|         |             |             |            |           |         |
|---------|-------------|-------------|------------|-----------|---------|
| SAMPLE  | date        | Jun 14 2006 | dfreq      | DEC. & VT | 599.942 |
| solvent | CDCl3       |             | dn         | H1        | 30      |
| file    | ACQUISITION | exp         | dpwr       | nm        | 0       |
| sfreq   | 599.942     | dm          | dot        | nm        | 0       |
| tn      | H1          | dmm         |            | C         | 200     |
| at      | 1.892       | dseq        |            | 1.0       | n       |
| nd      | 3.027       | dres        |            |           |         |
| sw      | 8000        | homo        |            |           |         |
| fb      | 4000        |             |            |           |         |
| bs      | 32          |             |            |           |         |
| tpwr    | 56          | dfreq2      | DEC2       | 0         |         |
| pw      | 5.5         | dn2         |            |           |         |
| d1      | 0           | dpwr2       |            | 1         |         |
| tof     | 0           | dot2        |            | n         |         |
| nt      | 16          | dmm2        |            | C         |         |
| ct      | 0           | dmf2        |            | 200       |         |
| atlock  | n           | dseq2       |            | 1.0       |         |
| gain    | not used    | dres2       |            | n         |         |
| FLAGS   |             | homo2       | DEC3       | 0         |         |
| fl      | n           | dfreq3      |            |           |         |
| in      | Y           | dn3         |            |           |         |
| dp      | Y           | dpwr3       |            | 1         |         |
| hs      | nm          | dot3        |            | n         |         |
| DISPLAY | -999.7      | dmm3        |            | C         |         |
| SP      | 7999.5      | dmf3        |            | 200       |         |
| WP      | 102         | dseq3       |            | 1.0       |         |
| VS      | 35          | dres3       |            | n         |         |
| SC      | 215         | homo3       | PROCESSING |           |         |
| WC      | 1.20        | wtfile      |            |           |         |
| h2mm    | 102.67      | proc        | not used   |           |         |
| IS      | 1000.1      | fn          |            |           |         |
| rfl     | 0           | math        |            |           |         |
| th      | 6           | werr        |            |           |         |
| ins     | 6.000       | wexp        |            |           |         |
| nm      | cdc         | wbs         |            |           |         |
| ph      |             | wnt         |            |           |         |
|         |             | wft         |            |           |         |

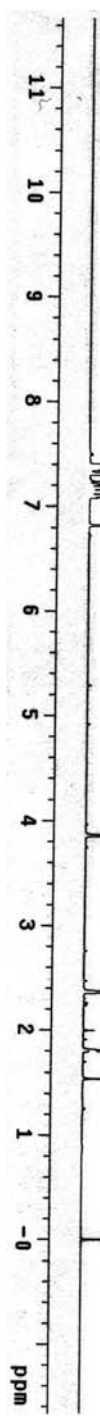

Dong\_PTV\_102\_13C

exp2 szpu1

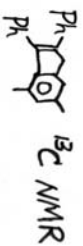

SAMPLE Jun 14 2006 DEC. & VT 599.942  
 date Jun 14 2006 dfrq 599.942  
 solvent CDC13 dn H1  
 file ACQUISITION exp dpvr 39  
 sfrq 150.871 dm 0  
 tn 1.305 dmf mny  
 nt 90272 dseq 16667  
 SW 34707.2 dres 1.0  
 fb 13000 homo n  
 bs 8 DECC2 0  
 tpr 54 dfrq2 0  
 pw 6.0 dn2 1  
 dl 3.000 dpvr2 0  
 tof 3017.4 dot2 n  
 nt 10000 dm2 n  
 ct 0 dmm2 C  
 alock n dmr2 16667  
 gain not used dseq2 1.0  
 flags n dres2  
 n homo2 DECC3 0  
 n n dfrq3  
 n y dn3  
 n y dpvr3 1  
 n dn3 0  
 DISPLAY -875.1 dm3 n  
 SP 34706.6 dms3 n  
 WP 145 dmm3 C  
 VS 0 dmfr3 16667  
 SC 0 dseq3  
 WC 250 dres3 1.0  
 hzmm 138.83 homo3  
 IS 500.00 PROCESSING n  
 rf1 12491.4 lb Wtfile 0.50  
 rfp 11615.8  
 th 6  
 rms 100.000  
 nm cdc ph  
 match  
 werr  
 wexp  
 wbs  
 wnt

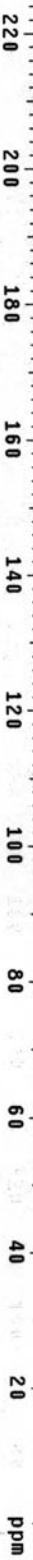



Dong\_PIV\_108\_1H

exp1 szpu1

| SAMPLE      | date        | May 13 2006                                   | dfreq   | DEC. & VI | 599.942 |
|-------------|-------------|-----------------------------------------------|---------|-----------|---------|
| solvent     | May 13 2006 | dfreq <td>599.942</td> <td>HI</td> <td>0</td> | 599.942 | HI        | 0       |
| FT1         | CDCl3       | dm                                            | 599.942 | HI        | 0       |
| ACQUISITION | exp         | dpwr                                          | 599.942 | HI        | 0       |
| dfreq       | 599.942     | dm                                            | 599.942 | HI        | 0       |
| tn          | HI          | dmm                                           | 599.942 | HI        | 0       |
| at          | 1.892       | dntf                                          | 599.942 | HI        | 0       |
| np          | 30272       | dseq                                          | 599.942 | HI        | 0       |
| sw          | 8000.0      | dres                                          | 599.942 | HI        | 0       |
| td          | 4000        | homo                                          | 599.942 | HI        | 0       |
| tpwr        | 55          | dfreq2                                        | 599.942 | HI        | 0       |
| pw          | 6.0         | dn2                                           | 599.942 | HI        | 0       |
| d1          | 3.000       | dpwr2                                         | 599.942 | HI        | 0       |
| tof         | 0           | dof2                                          | 599.942 | HI        | 0       |
| nt          | 8           | dn2                                           | 599.942 | HI        | 0       |
| ct          | 8           | dmm2                                          | 599.942 | HI        | 0       |
| atlock      | not used    | n                                             | 599.942 | HI        | 0       |
| gain        | not used    | n                                             | 599.942 | HI        | 0       |
| l1          | n           | homo2                                         | 599.942 | HI        | 0       |
| in          | n           | dfreq3                                        | 599.942 | HI        | 0       |
| dp          | y           | dn3                                           | 599.942 | HI        | 0       |
| hs          | n           | dpwr3                                         | 599.942 | HI        | 0       |
| DISPLAY     | 7981.7      | dof3                                          | 599.942 | HI        | 0       |
| sp          | 7981.7      | dm3                                           | 599.942 | HI        | 0       |
| vp          | 7981.7      | dmm3                                          | 599.942 | HI        | 0       |
| vc          | 0           | dof3                                          | 599.942 | HI        | 0       |
| sc          | 0           | dmm3                                          | 599.942 | HI        | 0       |
| wc          | 220         | dseq3                                         | 599.942 | HI        | 0       |
| hzm         | 0.35        | dres3                                         | 599.942 | HI        | 0       |
| ls          | 343.34      | homo3                                         | 599.942 | HI        | 0       |
| rfl         | 992.2       | WfFile                                        | 599.942 | HI        | 0       |
| ft          | 30          | Proc                                          | 599.942 | HI        | 0       |
| in          | 30          | ft                                            | 599.942 | HI        | 0       |
| ms          | 2.000       | math                                          | 599.942 | HI        | 0       |
| mm          | 2.000       | math                                          | 599.942 | HI        | 0       |
| WERT        |             |                                               |         |           |         |
| WEXP        |             |                                               |         |           |         |
| WDS         |             |                                               |         |           |         |
| WNT         |             |                                               |         |           |         |
| WFL         |             |                                               |         |           |         |

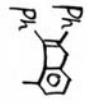

(2)

<sup>1</sup>H NMR

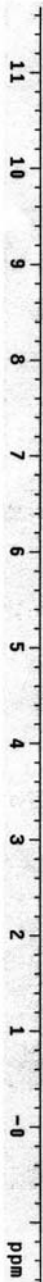

Dong\_PIV\_105\_13C

```

exp2 s2pu1
SAMPLE
date May 13 2006 dfrq DEC. & VT 599.942
solvent 13CDCl3 dn HI
file ACQUISITION exp dpwr 39
sfrq 150.871 dm dof 0
in C13 dnm nny
at 1.309 dnf W
np 30272 dsdq 16667
rh 3418006 Res 1.0
bs 18000 HOMO n
lpwr 61 dfrq2 DEC2 0
d1 3.000 dpwr2 1
lof 3017.4 dof2 0
nt 5000 dm2 C
clock 684 dnm2 n
alock not used dmf2 16667
gath FLAGS n dmf2
11 n homoz 1.0
in n DEC3 0
dp y dfrq3
hs nm dn3
DISPLAY -876.8 dpwr3 1
sp 34706.8 dms 0
wp 4 dmf3 n
se 0 dsdq 16667
vc 250 dres3 C
hzzm 1.28 dres3 1.0
is 500.00 homos
rf1 12493.1 wflie
rfp 11615.8 pproc
th 7 n
ins cdc ph 100.000 math not used f

```

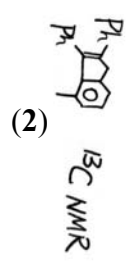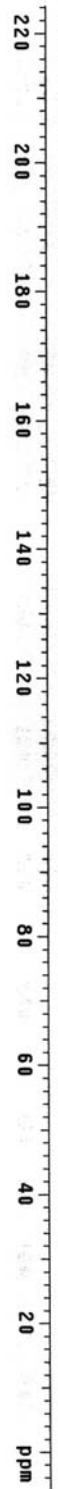

Dong\_PIV\_104\_1H

expl szpu1

| date        | SAMPLE   | DEC. & VT |
|-------------|----------|-----------|
| Apr 23 2006 | 599.942  | 599.942   |
| solvent     | CDC13    | H1        |
| f1          | exp      | 30        |
| ft1         | exp      | 30        |
| sfreq       | 599.942  | mm        |
| tn          | H1       | mm        |
| at          | 1.892    | dfes      |
| np          | 30272    | dfes      |
| sw          | 8000.0   | dfes      |
| fb          | 4000     | homo      |
| bs          | 32       | DEC2      |
| tpwr        | 39       | dfes2     |
| pw          | 6.0      | dm2       |
| hi          | 3.000    | dm2       |
| tof         | 8        | dm2       |
| nt          | 8        | dm2       |
| ct          | 0        | dm2       |
| atlock      | n        | dm2       |
| gain        | not used | dm2       |
| flags       | not used | dm2       |
| l1          | n        | homo2     |
| l2          | n        | homo2     |
| l3          | n        | homo2     |
| l4          | n        | homo2     |
| l5          | n        | homo2     |
| l6          | n        | homo2     |
| l7          | n        | homo2     |
| l8          | n        | homo2     |
| l9          | n        | homo2     |
| l10         | n        | homo2     |
| l11         | n        | homo2     |
| l12         | n        | homo2     |
| l13         | n        | homo2     |
| l14         | n        | homo2     |
| l15         | n        | homo2     |
| l16         | n        | homo2     |
| l17         | n        | homo2     |
| l18         | n        | homo2     |
| l19         | n        | homo2     |
| l20         | n        | homo2     |
| l21         | n        | homo2     |
| l22         | n        | homo2     |
| l23         | n        | homo2     |
| l24         | n        | homo2     |
| l25         | n        | homo2     |
| l26         | n        | homo2     |
| l27         | n        | homo2     |
| l28         | n        | homo2     |
| l29         | n        | homo2     |
| l30         | n        | homo2     |
| l31         | n        | homo2     |
| l32         | n        | homo2     |
| l33         | n        | homo2     |
| l34         | n        | homo2     |
| l35         | n        | homo2     |
| l36         | n        | homo2     |
| l37         | n        | homo2     |
| l38         | n        | homo2     |
| l39         | n        | homo2     |
| l40         | n        | homo2     |
| l41         | n        | homo2     |
| l42         | n        | homo2     |
| l43         | n        | homo2     |
| l44         | n        | homo2     |
| l45         | n        | homo2     |
| l46         | n        | homo2     |
| l47         | n        | homo2     |
| l48         | n        | homo2     |
| l49         | n        | homo2     |
| l50         | n        | homo2     |
| l51         | n        | homo2     |
| l52         | n        | homo2     |
| l53         | n        | homo2     |
| l54         | n        | homo2     |
| l55         | n        | homo2     |
| l56         | n        | homo2     |
| l57         | n        | homo2     |
| l58         | n        | homo2     |
| l59         | n        | homo2     |
| l60         | n        | homo2     |
| l61         | n        | homo2     |
| l62         | n        | homo2     |
| l63         | n        | homo2     |
| l64         | n        | homo2     |
| l65         | n        | homo2     |
| l66         | n        | homo2     |
| l67         | n        | homo2     |
| l68         | n        | homo2     |
| l69         | n        | homo2     |
| l70         | n        | homo2     |
| l71         | n        | homo2     |
| l72         | n        | homo2     |
| l73         | n        | homo2     |
| l74         | n        | homo2     |
| l75         | n        | homo2     |
| l76         | n        | homo2     |
| l77         | n        | homo2     |
| l78         | n        | homo2     |
| l79         | n        | homo2     |
| l80         | n        | homo2     |
| l81         | n        | homo2     |
| l82         | n        | homo2     |
| l83         | n        | homo2     |
| l84         | n        | homo2     |
| l85         | n        | homo2     |
| l86         | n        | homo2     |
| l87         | n        | homo2     |
| l88         | n        | homo2     |
| l89         | n        | homo2     |
| l90         | n        | homo2     |
| l91         | n        | homo2     |
| l92         | n        | homo2     |
| l93         | n        | homo2     |
| l94         | n        | homo2     |
| l95         | n        | homo2     |
| l96         | n        | homo2     |
| l97         | n        | homo2     |
| l98         | n        | homo2     |
| l99         | n        | homo2     |
| l100        | n        | homo2     |

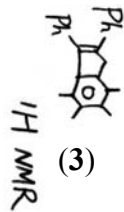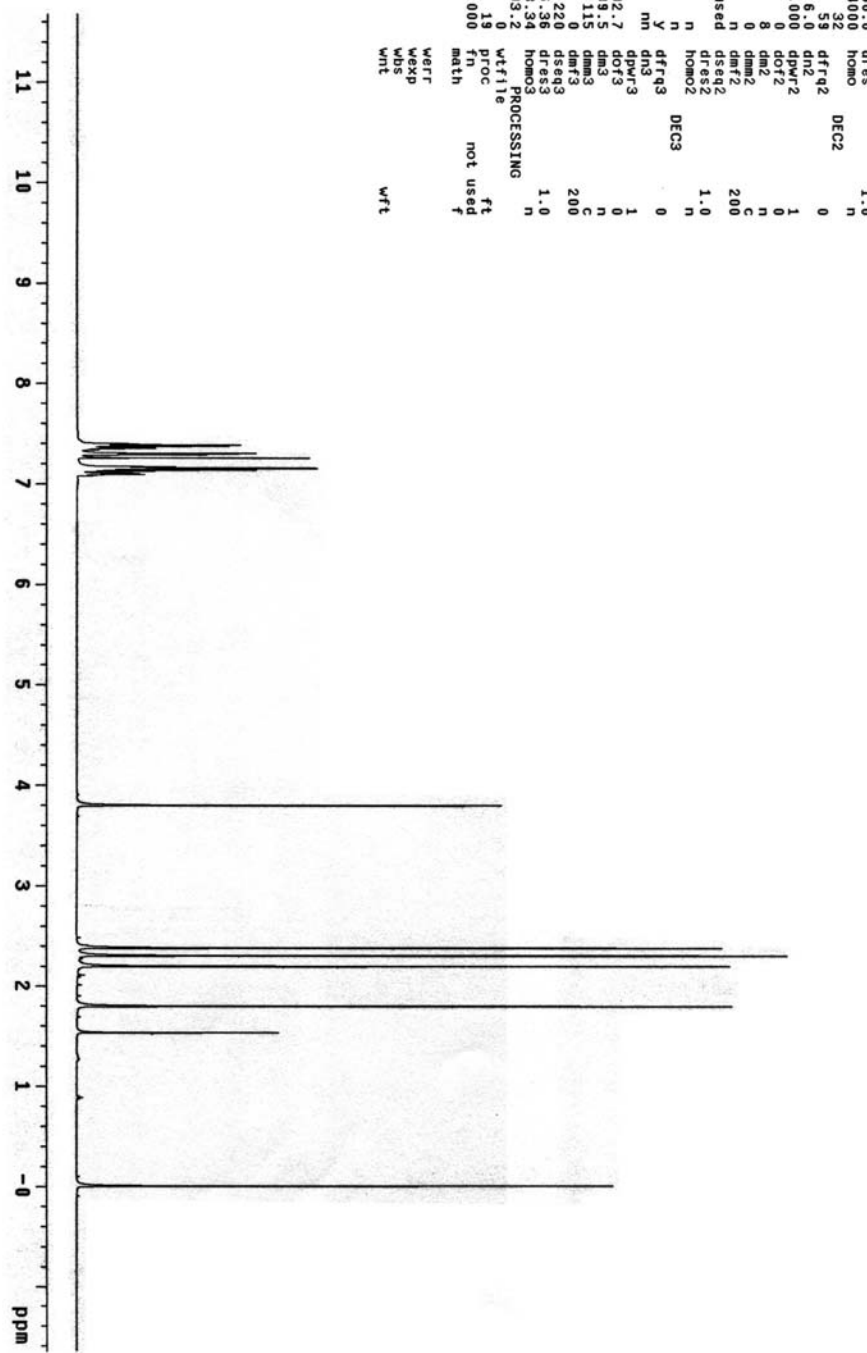

Dong\_PIV\_104\_13C  
exp2 szpu1

| date    | SAMPLE      | 5 2006 | dfrc   | DEC. & VT  | 599.942 |
|---------|-------------|--------|--------|------------|---------|
| solvent | CDCl3       | exp    | dn     | HI         | 1       |
| f1      | ACQUISITION | exp    | ddp    | 30         | 0       |
| sfrcq   | 150.871     | dm     | dm     | my         | 0       |
| tn      | C13         | dmm    | dm     | w          | 1       |
| at      | 1.300       | dmt    | dres   | 16667      | 1.0     |
| np      | 90272       | dseg   | dres   | 1.0        | 0       |
| sv      | 34707.2     | dres   | homo   | DEC2       | 0       |
| fb      | 19000       | homo   | homo   | DEC3       | 0       |
| vs      | 6           | dfrc2  | dfrc2  | 1          | 0       |
| pw      | 3.000       | dpwr2  | dpwr2  | 1          | 0       |
| dl      | 3017.4      | dof2   | dof2   | n          | 0       |
| nt      | 10000       | dm2    | dm2    | n          | 0       |
| ct      | 2632        | dmm2   | dmm2   | c          | 16667   |
| alock   | not used    | dmm2   | dres2  | 1.0        | 0       |
| gain    | not used    | dres2  | dres2  | 1.0        | 0       |
| ll      | n           | homo2  | homo2  | DEC3       | 0       |
| ln      | n           | dfrc3  | dfrc3  | 1          | 0       |
| dn      | y           | dm3    | dm3    | n          | 0       |
| hs      | n           | dfrc3  | dfrc3  | n          | 0       |
| sp      | DISPLAY     | nm     | nm     | 1          | 0       |
| wp      | -875.7      | dof3   | dof3   | n          | 0       |
| vs      | 34706.6     | dm3    | dm3    | n          | 0       |
| vc      | 73          | dmm3   | dmm3   | c          | 16667   |
| sc      | 0           | dfr3   | dfr3   | 1.0        | 0       |
| wc      | 250         | dseg3  | dseg3  | 1.0        | 0       |
| h2mm    | 16.65       | dres3  | dres3  | 1.0        | 0       |
| h1      | 510.00      | homo   | homo   | PROCESSING | n       |
| rfl     | 12482.0     | wfille | wfille | 4          | 0       |
| th      | 11615.6     | proc   | proc   | not used   | f       |
| ins     | 100.000     | fn     | fn     | math       | 0       |
| nm      | cdc         | ph     | ph     | math       | 0       |
|         |             | weir   | weir   | 0          | 0       |
|         |             | wexp   | wexp   | 0          | 0       |
|         |             | wos    | wos    | 0          | 0       |
|         |             | wnt    | wnt    | 0          | 0       |

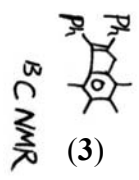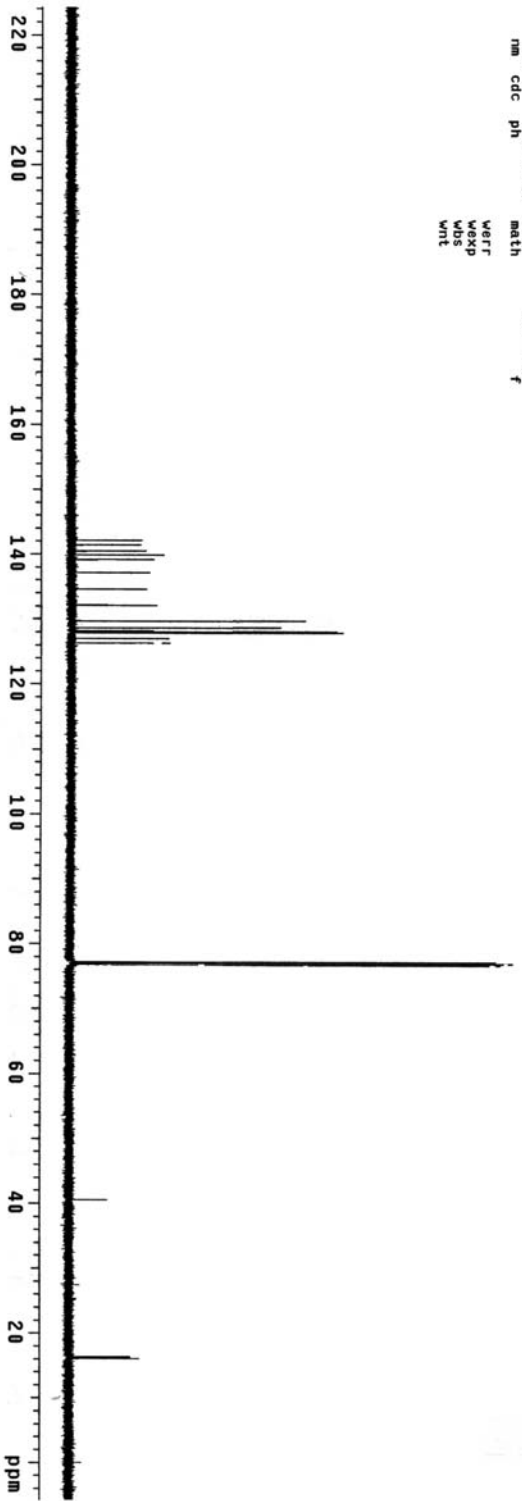

00mg\_PIV\_112\_1M

expl s2pu1

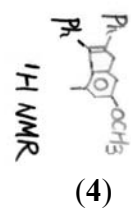

SAMPLE DEC. & VT  
 date Jun 7 2006 dfrq 599.942  
 solvent CDCl3 dn H1  
 file ACQUISITION exp dpwr H1  
 sfrq 599.942 dof 30  
 in H1 dnm mnm  
 at 1.892 dmf 200  
 np 30272 dseq 1.0  
 sw 8000.0 dres homo  
 fb 4000  
 ds 32  
 dpwr 59 dfrq2 DEC2 0  
 di 57 dfrq2  
 dt 0 dof2 1  
 tof 0 dof2 0  
 nt 8 dnm2 n  
 ct 8 dnm2 n  
 alock not used dnm2 200  
 gain not used dseq2 1.0  
 l1 n homo2 DEC3 0  
 in n  
 dn Y dfrq3  
 dp n dn3 dpwr3 1  
 hs nm  
 DISPLAY  
 sp -991.7 dof3 0  
 wp 7999.5 dnm3 n  
 wv 135 dnm3 n  
 sc 215 dfrq3 200  
 wc 0.23 dres3 1.0  
 hzmm 39.57 homo3  
 ffr1 992.2  
 ffr2 0  
 ffr3 22  
 pproc not used  
 fts math  
 nm cdc ph 3.000  
 werr  
 wexp  
 wds  
 wnt wft

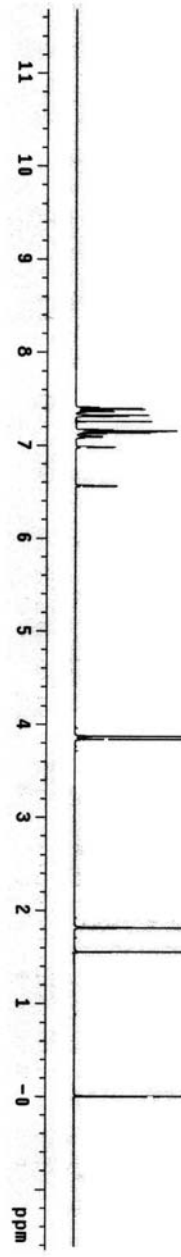

Donq\_PIV\_112\_13C

exp2 s2pul

| date    | SAMPLE      | 7 2006 | dfreq | DEC. & VT | 599.942 |
|---------|-------------|--------|-------|-----------|---------|
| Jun     | 7 2006      |        | dfreq | DEC2      | 0       |
| solvent | CDC13       |        | dm2   | DEC2      | 0       |
| file    | ACQUISITION | exp    | dm3   | DEC3      | 0       |
| sfreq   | 150.871     | dm     | dmf   |           |         |
| tn      | C13         | dm     | dmf   |           |         |
| at      | 1.300       | dmf    | dseq  |           |         |
| np      | 90272       | dseq   | dres  |           |         |
| sw      | 34707.2     | dres   | homo  |           |         |
| fb      | 19000       | homo   |       |           |         |
| bs      | 8           |        |       |           |         |
| tpwr    | 61          | dfreq2 |       |           |         |
| pw      | 3.000       | dm2    |       |           |         |
| tof     | 3017.4      | dm2    |       |           |         |
| nt      | 30000       | dm2    |       |           |         |
| ct      | 464         | dm2    |       |           |         |
| atlock  | n           | dmf2   |       |           |         |
| gain    | not used    | dseq2  |       |           |         |
| 11      | FLAGS       | dres2  |       |           |         |
| in      | n           | homo2  |       |           |         |
| dp      | y           | dfreq3 |       |           |         |
| hs      | DISP        | dm3    |       |           |         |
| SP      | DISPLAY     | dm3    |       |           |         |
| WD      | -875.6      | dm3    |       |           |         |
| VS      | 34706.6     | dm3    |       |           |         |
| SC      | 71          | dmf3   |       |           |         |
| WC      | 250         | dseq3  |       |           |         |
| h2mm    | 27.48       | dres3  |       |           |         |
| 15      | 500.00      | homo3  |       |           |         |
| rfl     | 1291.9      | math   |       |           |         |
| trf     | 1015.8      | math   |       |           |         |
| ins     | 100.000     | math   |       |           |         |
| nm      | cdc         | math   |       |           |         |
| ph      | 100.000     | math   |       |           |         |
|         | werr        |        |       |           |         |
|         | wexp        |        |       |           |         |
|         | wds         |        |       |           |         |
|         | wnt         |        |       |           |         |

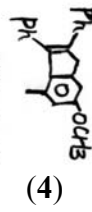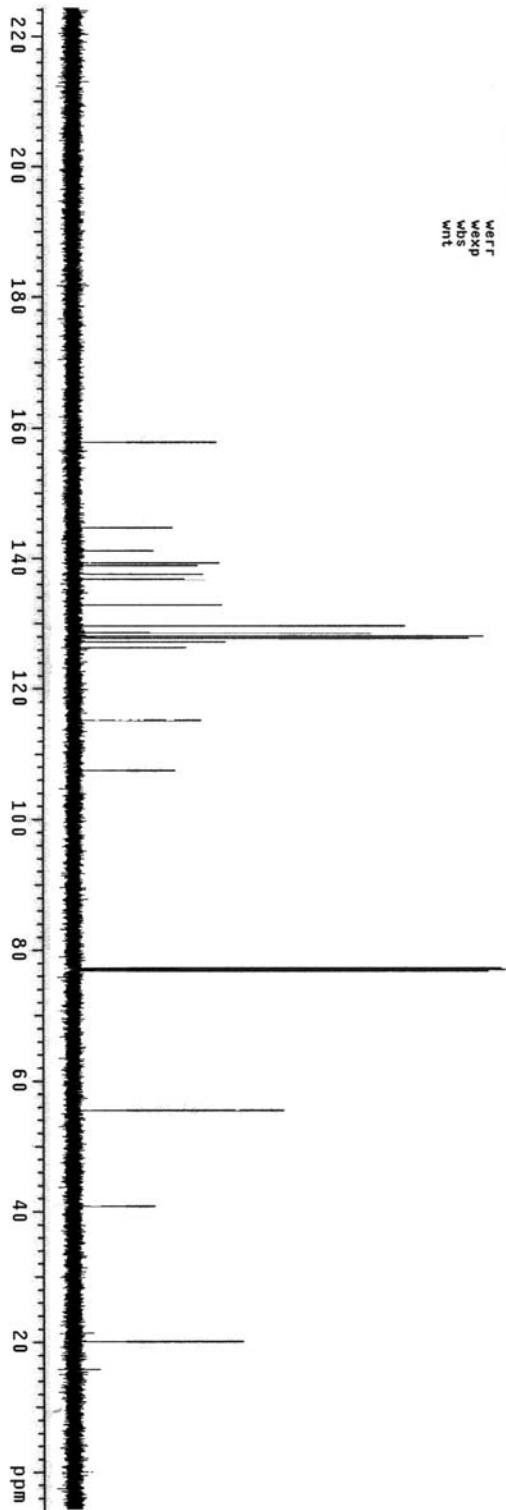

Dong\_P1V\_101\_1H  
 exp1 s2pu1

SAMPLE DEC. & VT  
 date May 21 2006 dfrq 399.942  
 solvent CHCl3 exp 30  
 file C0013 dpr 30  
 ACQUISITION dof 0  
 sfrq 599.942 dm  
 tn H1 dm  
 at 1.892 dnt 200  
 np 3.0272 dseq 200  
 sp 80000 dres 1.0  
 fb 40000 homo  
 bs 4032  
 tpwr 59 dfrq2 DEC2  
 pw 6.0 dh2 0  
 di 3.000 dpwr2 1  
 tof 0 dof2 0  
 nt 8 dm2 n  
 st 0 dm3 n  
 alock 0 dres2 200  
 gain not used dres3 1.0  
 flags  
 i1 n homo2 n  
 i2 n dfrq3 DEC3  
 i3 y dfrq3 0  
 dp n dh3 1  
 ds dpwr3 0  
 sp 2.000 dnt 0  
 wp 7999.5 dnt3 n  
 vs 87 dnt3 n  
 sc 0 dnt3 200  
 wc 220 dseq3 n  
 hzmm 0.20 dres3 1.0  
 is 40.59 homo3  
 rfn 392.7 vrf file PROCESSING  
 rfp 3  
 th fn not used ft  
 ins cdc ph 6.000 math  
 warr  
 wexp  
 wds  
 wnt wft

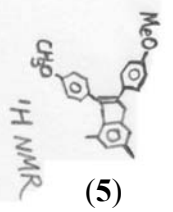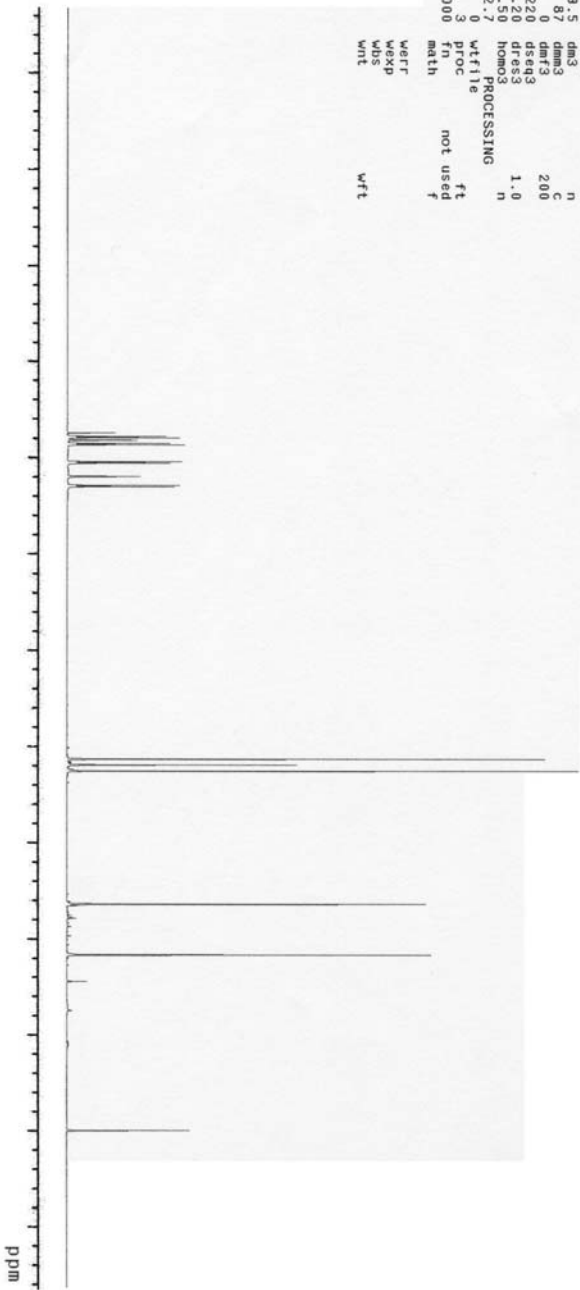

Dong\_PIV\_101\_13C

exp2 s2pu1

SAMPLE date May 21 2006  
solvent CDCl3  
file ACQUISITION exp

sfreq 150.821  
tn C13  
at 1.300  
np 90272  
sw 34707.2  
fb 19000  
bs 8  
tpwr 61  
pw 5.0  
d1 0.00  
tof 3017.4  
nt 30000  
ct 992  
alock n  
gain not used

DEC 599.942  
dfrq  
dn  
dpcr  
dof  
dmm  
dmf  
dseq  
dres  
homo

DEC2  
dfrq2  
dn2  
dpcr2  
dof2  
dm2  
dmm2  
dmf2  
dseq2  
dres2  
homo2

DEC3  
dfrq3  
dn3  
dpcr3  
dof3  
dm3  
dmm3  
dmf3  
dseq3  
dres3  
homo3

DISPLAY -886.2  
wp 34706.6  
250  
138.83  
590.00  
12502.6  
11815.8  
100.000

PROCESsing  
wt111e  
proc fn  
nm ph  
100.000  
not used

WEFT  
wexp  
wds

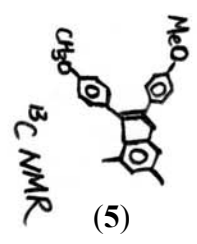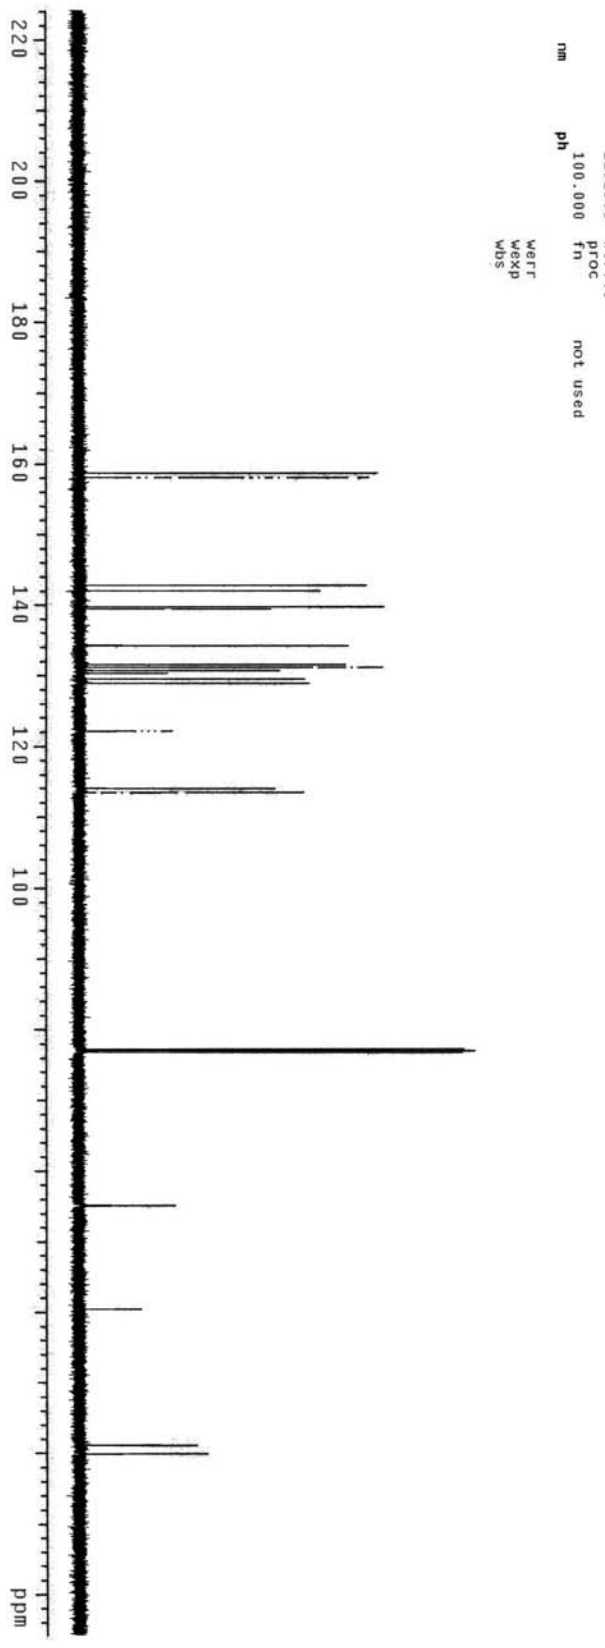



Dong\_VIV\_P4\_01\_1H  
expt1 s2pu1

SAMPLE Jun 21 2006 dfrq DEC. & VT 589.942  
solvent Jun 21 2006 dn H1  
file CDC13 exp dpr 30  
ACQUISITION exp dpr 30  
sfrq 589.942 dn mm  
tn H1 dmm C  
at 1.892 dmf 200  
np 30272 dseq 1.0  
sw 8000.0 dres  
fb 4000 homo  
bs 58 dfrq2 DEC2  
dpr 58  
d1 0 dn2  
d2 0 dn2  
nt 16 dm2  
ct 16 dmm2  
atlock n dm2  
gain not used dseq2 1.0  
11 n dn2  
in Y dfrq3 DEC3  
dp n dn3  
hs DISPLAY nm dpr3 1  
sp -982.3 dof3 0  
wp 7989.5 dms 0  
vs 99 dms3 200  
vc 250 dseq3  
hzmm 0.52 dres3  
15 18.72 homos 1.0  
ffl 982.8 wfile PROCESSING  
th 0 proc  
ins 17 fn not used  
nm 6.000 math

WERR  
WEXP  
WBS  
WNT  
WFT

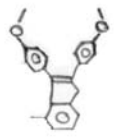

(9)

<sup>1</sup>H NMR

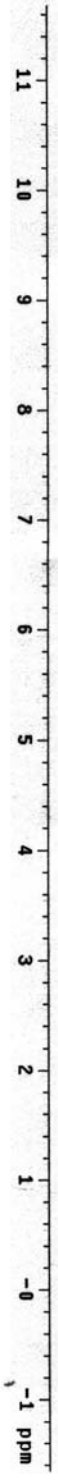

Dong\_VIV\_PA\_G1\_13C

exp2 s2pu1

| date           | SAMPLE   | DEC. & VT | dfreq | 599.942 | H1 |
|----------------|----------|-----------|-------|---------|----|
| Jun 21 2006    | CDC13    | dm        | 30    | 0       |    |
| solvent        | exp      | dm        | any   | w       |    |
| 11 ACQUISITION | 150.871  | dm        | 16667 | 1.0     |    |
| sfreq          | C13      | dmm       |       |         |    |
| tn             | 1.300    | dmt       |       |         |    |
| at             | 50272    | dseq      |       |         |    |
| np             | 3470.2   | dres      |       |         |    |
| pw             | 19008    | homo      |       |         |    |
| bs             | 61       | dfreq2    |       |         |    |
| tpwr           | 5.0      | dn2       |       |         |    |
| pl             | 3.000    | dpwr2     |       |         |    |
| d1             | 3017.4   | dot2      |       |         |    |
| nt             | 5000     | dms2      |       |         |    |
| rt             | 752      | dms2      |       |         |    |
| clock          | not used | dres2     |       |         |    |
| gain           | not used | dres2     |       |         |    |
| 11             | n        | homo2     |       |         |    |
| in             | n        | DECS      |       |         |    |
| hs             | y        | dfreq3    |       |         |    |
| dp             | mn       | dms3      |       |         |    |
| sp             | DISPLAY  | dpwr3     |       |         |    |
| wp             | -878.6   | dm3       |       |         |    |
| vc             | 34708.6  | dms3      |       |         |    |
| vs             | 65       | dms3      |       |         |    |
| sc             | 0        | dms3      |       |         |    |
| wc             | 250      | dseq3     |       |         |    |
| h2mm           | 1.26     | dres3     |       |         |    |
| rs             | 5000.00  | dres3     |       |         |    |
| rfl            | 1290.0   | homo3     |       |         |    |
| th             | 11615.8  | homo3     |       |         |    |
| ins            | 8        | proc      |       |         |    |
| nm             | 100.000  | fn        |       |         |    |
| cdc            | ph       | math      |       |         |    |
| wt             |          | not used  |       |         |    |
| Werr           |          | ft        |       |         |    |
| Wexp           |          | f         |       |         |    |
| Wts            |          |           |       |         |    |
| Wnt            |          |           |       |         |    |

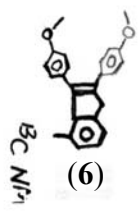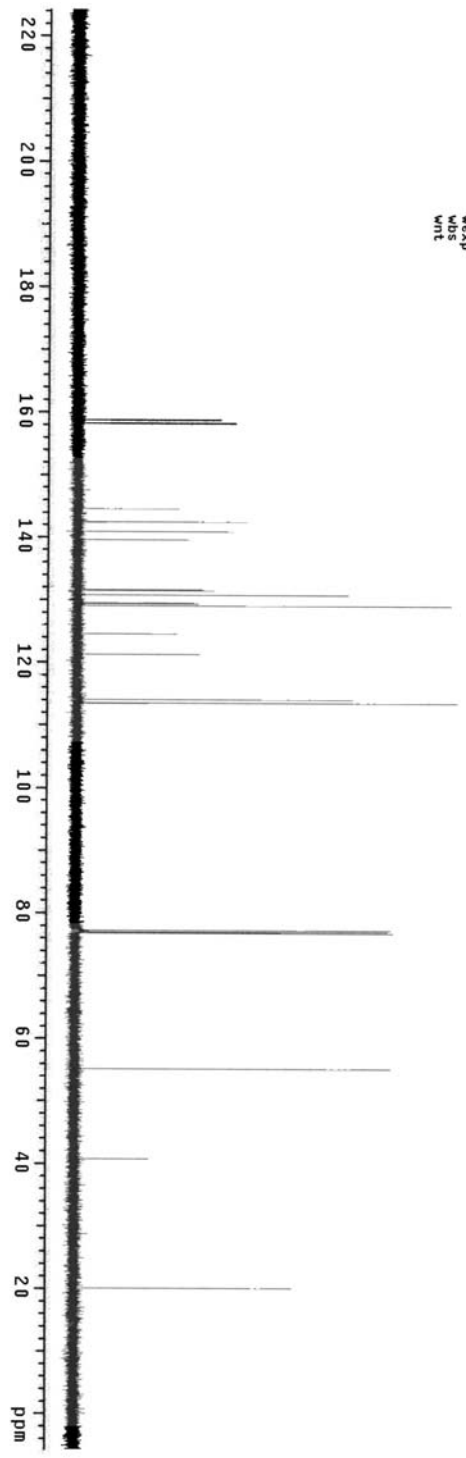

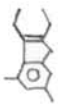
  
 ⑦
   
 1H NMR

```

Dong_1
expl std:
SAMPLE 2 2006
date Jun 12 2006
solvent CDCl3
FT ACQUISITION exp
sfrq 200.057
in H1
at 3.744 dm
np 22464 dseq
sw 3000.1 dres
fb 1600 homo
bs 4
tpwr 55
pw 7.0
d1 3.000
cp 64
ct 64
alock n
gain not used
flags not used
nt wnt
11 n
in n
dp y
hs nm
DISPLAY -719.5
sp
wp 3000.1
vs 98
sc 250
vc 0.02
h2mm 500.00
f1 719.5
rfp 0
th 2
nm cdc ph 100.000
  
```

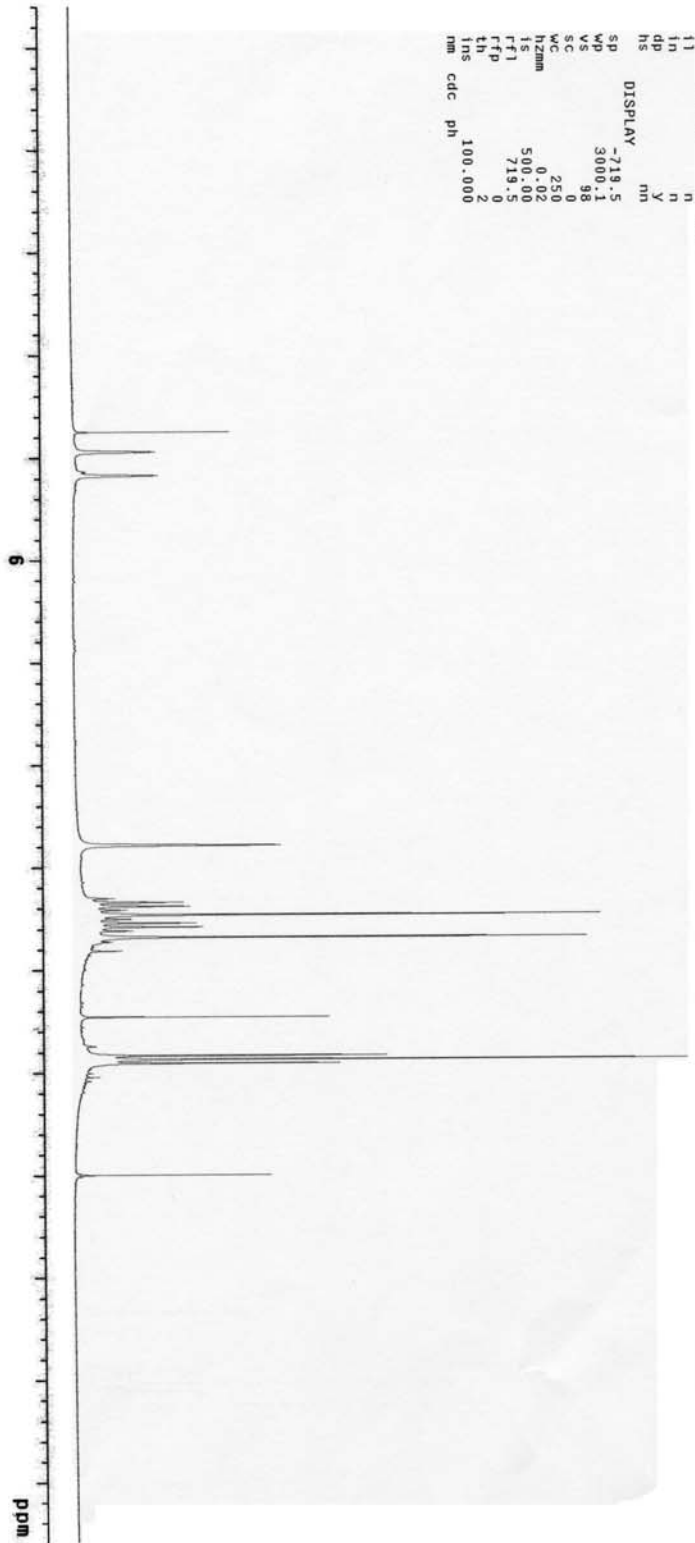



D00ng\_PIV\_120\_4H

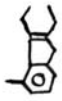

<sup>1</sup>H NMR

(8)

```

expt  szpul          SAMPLE          DEC. & VT          595.942
date   Jun 19 2006   CDC13          dn          H1
solvent                               exp          H1
file ACQUISITION 595.942   dm          30
sfreq 595.942      H1          mm
tn      1.892      H1          mm
at      30272     dsef          C
sw      8000.0    dres          200
fb      4000      homo          1.0
us      56        dfrq2     DEC2
dpwr    5.5      dn2
di      0         dpwr2     1
tof     0         dof2     1
nt      8         dm2      C
ct      8         dmm2     200
alock   n         dmf2     1.0
gain    not used dres2
flags   n         dn2      0
l1      n         dn3      0
in      y         dfrq3     DEC3
dp      nm          dn3
hs      DISPLAY   nm          dn3
sp      7981.2     dpwr3     1
wp      7981.0     dof3     1
vc      104       dmm3     C
sc      0         dmf3     200
wzmm    0.24      dres3     1.0
ls      102.67   homo3
rf1     595.942  wffile   PROCESSING
rfp     2         proc
tsh     2         fn
ins     1.000    math     not used
ms      cdc      ph

```

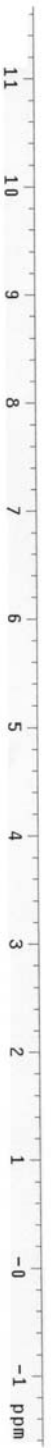

Dong\_PIV\_120\_13C

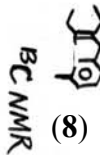

```

exp2 s2pu1
SAMPLE
date Jun 21 2006 dfrq DEC. 2 VT 599.942
solvent CDC13 dn H1
file ACQUISITION exp dpwr 39
sfrq 150.871 dm nny 0
tn C13 dnm W
at 1.390 dmf 16667
np 1.222 dseq 1.0
sp 3470.72 dseq 1.0
fb 19000 homo
bs 8
tpwr 61 dfrq2 DEC2 0
pw 6.0 dn2
d1 3.000 dpwr2 1
tof 3017.4 dor2 0
nt 20000 dm2 n
dnt 9492 dm2 n
atlock gain not used 16667
gain FLAGS not used
11 n homo2 1.0
in n homo3
dp y dfrq3 DEC3 0
hs DISPLAY nm dn3
sp -872.3 dpwr3 1
wp 3470.6 dnt 1
vs 105 dms n
sc 0 dnm3 C
wc 250 dmf3 16667
h2am 31.89 dseq3
ts 500.00 dres3 1.0
fft 12488.6 homo3
tpp 11813.8 WtF18 PROCESSING
fns 8 Proc
ins 100.000 math not used
nm cdc ph
wert wexp
wbs
wnt

```

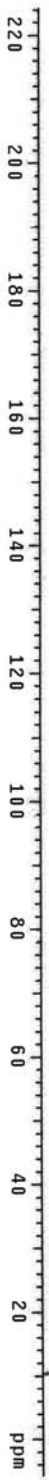

Domg\_P1V\_114\_1H

expt s2p01

|         |             |            |        |            |         |
|---------|-------------|------------|--------|------------|---------|
| SAMPLE  | date        | Jun 8 2006 | dfrc   | DEC. & VT  | 599.942 |
| solvent | CDCl3       |            | dmf    |            | 91      |
| file    | ACQUISITION | exp        | dpr    |            | 30      |
|         |             | dfrc       | dm     |            | 0       |
| frq     | 599.942     |            | dm     |            | mm      |
| in      | H1          |            | dm     |            | C       |
| at      | 1.892       |            | dse    |            | 200     |
| np      | 30272       |            | dres   |            | 1.0     |
| sw      | 8000.0      |            | homo   |            | n       |
| hb      | 4000        |            | homo   |            | n       |
| ts      | 32          |            | dfrc2  | DEC2       | 0       |
| tdpr    | 53          |            | dm2    |            | 1       |
| pw      | 3.000       |            | dpr2   |            | 0       |
| dl      | 0           |            | dfc2   |            | n       |
| tof     | 8           |            | dm2    |            | C       |
| nt      | 8           |            | dm2    |            | 200     |
| ct      | n           |            | dmf2   |            | 1.0     |
| alock   | not used    |            | dres2  |            | n       |
| gain    | not used    |            | homo2  | DEC3       | 0       |
| ll      | n           |            | dfrc3  |            | 1       |
| in      | n           |            | dmf3   |            | n       |
| ip      | y           |            | dmf3   |            | n       |
| hp      | nm          |            | dmf3   |            | C       |
| ns      | DISPLAY     | -998.4     | dm3    |            | 200     |
| sp      | WP          | 7999.5     | dm3    |            | 1.0     |
| vs      | SC          | 102        | dmf3   |            | n       |
| wc      | h2mm        | 32.250     | dres3  |            | n       |
| h2mm    | ts          | 223.51     | homo3  | PROCESSING | 1.0     |
| ts      | ffl         | 998.9      | homo3  |            | n       |
| ffl     | proc        | 0          | wfille |            | n       |
| ftp     | ft          | 0          | proc   |            | n       |
| ins     | ft          | 0          | math   |            | n       |
| nm      | cdc         | 2.000      | math   |            | n       |

WFT  
WEXP  
WBS  
WNT

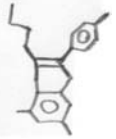

<sup>1</sup>H NMR

(9)

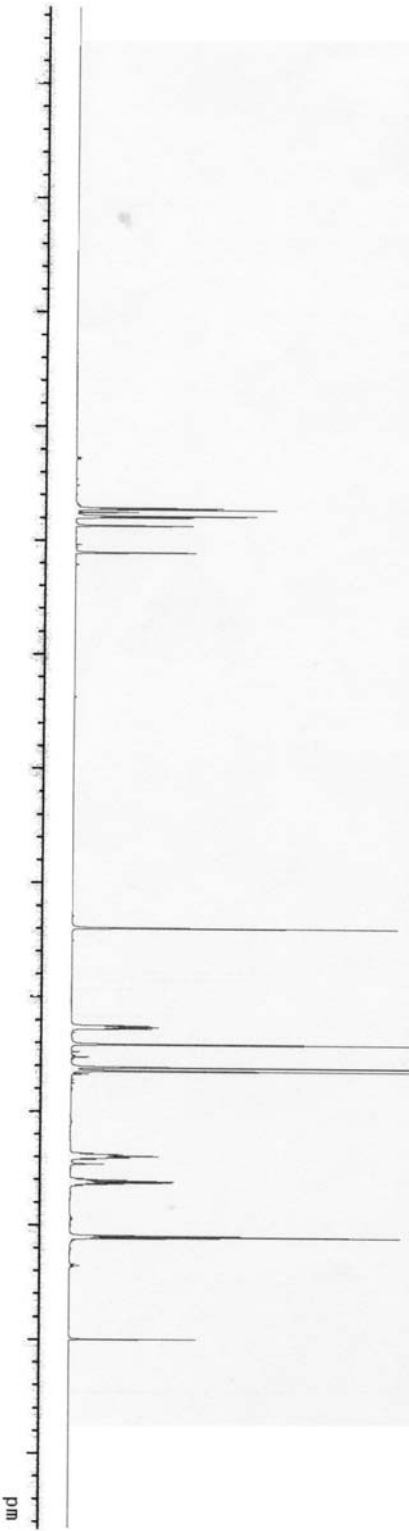

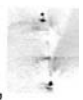

Dong\_PIV\_114\_13C

exp2 s2pu1

```

SAMPLE      Jun 8 2006      dfrq      DEC. & VT      599.942
solvent     Jun 8 2006      CDC13    dn          H1
f1file      ACQUISITION exp      dpuv       39
f2file      150.871      dot        14
tn          C13         dma        mvv        V
at          1.300      dmf        V
np          90272      dseq       16667
sw          34707.2   dres       1.0
fb          19000     homo
ds          81      dfrq2      DEC2       0
dpuv       6.0      dn2        0
d1          3.006     dpuv2      1
tof         3017.4    dot2       0
nt          30000     dma2       n
ct          8920     dma2       n
atlock     not used  dma2       C
gain       not used  dmf2       16667
          not used  dseq2      1.0
l1          n          dres2      n
in          n          homo2      n
dp          y          dfrq3      DEC3       0
hs          nm         dn3
          nm         dpuv3      1
          nm         dot3       0
          nm         dma3       n
          nm         dma3       C
          nm         dseq3      16667
          nm         dres3      1.0
          nm         homo3
          nm         proc
          nm         wfile
          nm         match
          nm         not used
          nm         ft
          nm         cdc
          nm         ph
          nm         weff
          nm         wexp
          nm         wbs
          nm         wnt

```

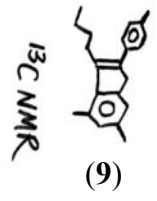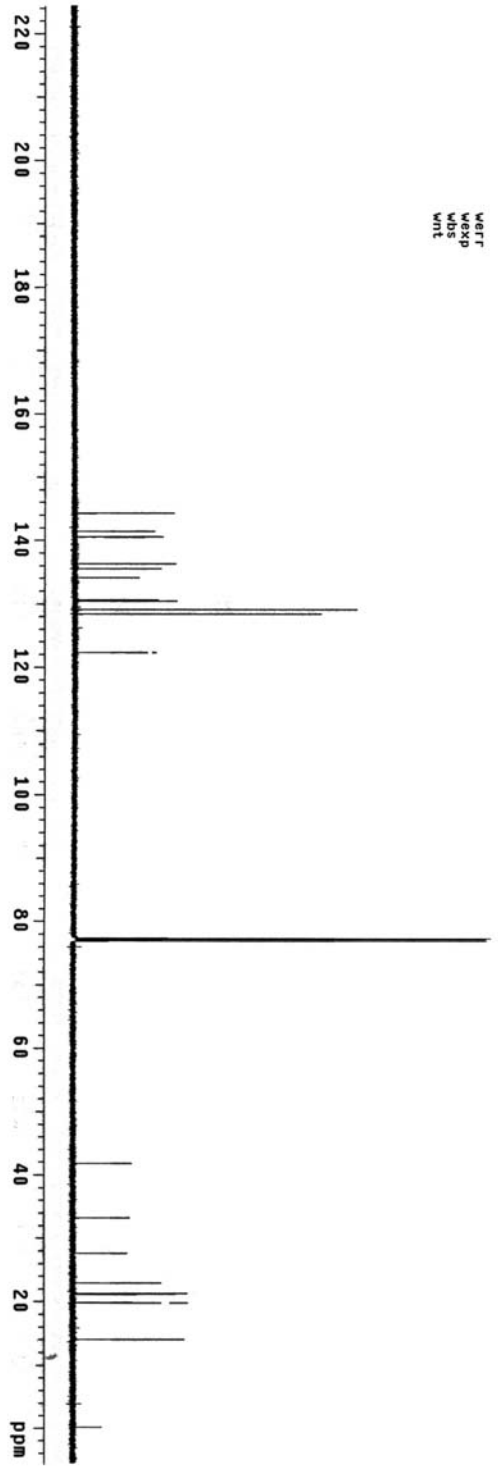



Dong\_PIV\_114\_noesy1D  
 Pulse Sequence: noesy1D  
 Solvent: CDCl3  
 Modulated Temperature  
 INOVA-500 40000  
 Relax delay 2.000 sec  
 Pulse program  
 Mixing 0.400 sec  
 Acq. time 1.892 sec  
 Width 8000.0 Hz  
 180 repetitions  
 OBSERVE N1 599.9393058 MHz  
 F1 A1 500.1362928 MHz  
 Total time 29 min, 25 sec

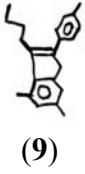

NOE Experiment

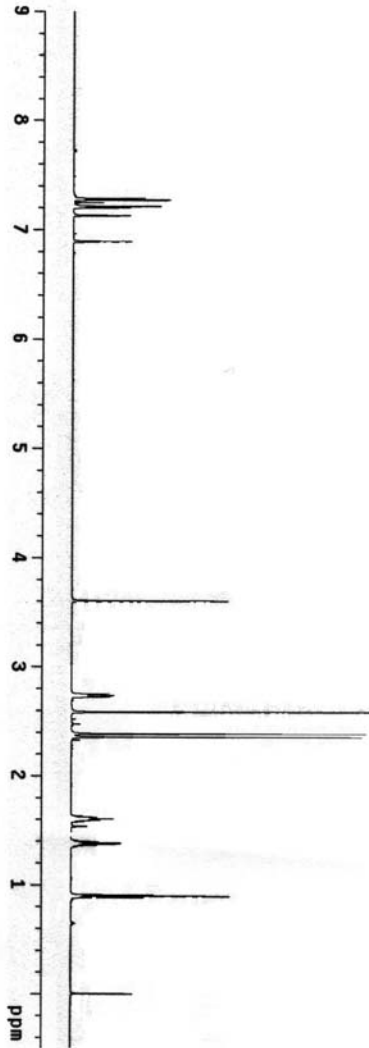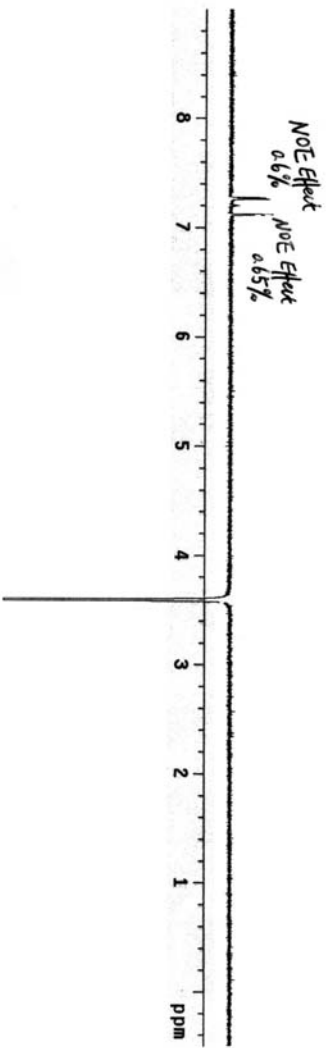

Ph C1=CC=C(C=C1)C2=CC=CC=C2  
 (10)

<sup>1</sup>H NMR

```

Donq_VIV_P109_1H
expt1 szpu1
SAMPLE
date Oct 3 2006 DEC. & VT
solvent CDC13 d1 d1 599.942
file exp dpwr 30
ACQUISITION 599.942 dm 0
sfrq 1.843 dm 200
tn 30272 dseg 1.0
mp 8000.0 dres 1.0
sw 4000 homo
bs 4 dfrq2 DEC2 0
tpwr 59 dfrq2
pw 6.0 d12 1
tof 3.000 dpwr2 1
nt 8 d12 1
ct 8 ddm2 n
atlock n dmf2 C
gain not used dseg2 200
flags n dres2 1.0
11 n homo2 DEC3 0
12 n dfrq3
13 n dn3
14 n dn3
15 n dn3
DISPLAY
sp -998.1 dof3 1
wp 7999.5 dm3 0
vc 119 ddm3 n
sc 220 dmf3 C
bzmm 30.00 dres3 200
ls 181.91 homo3 1.0
PROCESSING
ffl 0 wffile
fth 3 fproc
ins cdc ph 3.000 math not used
wfft wfft
wexp wexp
wbs wbs
wnt wnt
  
```

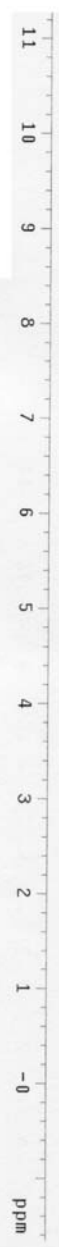

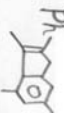

(10)

<sup>13</sup>C NMR

```

Dong_VIV_P109_13C
exp2 s2pu1
SAMPLE      date Oct 3 2008      dfrc DEC. & VT 599.942
solvent     Oct 3 2008      dn   H1
file        CDC13      exp   dpwr 39
ACQUISITION 150.871      dm   dof 0
sfrc        150.871      dm   dof 0
tp          1.300      dm   dof 0
nd          90272      dseg dres 16667
sw          34707.2      dres dres 1.0
fb          19000      homo 1.0
bs          8          dfrc2 DEC2 0
tpwr        61         dfrc2 dn2 0
pw          3.000      dpwr2 dn2 1
df          3017.4      dot2 dn2 0
ct          2978      dms2 dn2 0
ct          2978      dms2 dn2 0
atlock      not used   dseg2 dn2 16667
gain        not used   dres2 dn2 1.0
l1          n          homo2 dn2 0
ln          n          dfrc3 DEC3 0
dp          y          dfrc3 dn3 0
hs          n          dn3 0
DISPLAY     nm          dn3 0
sp          -872.5      dpc3 dn3 1
vs          34706.5      dpc3 dn3 0
vc          120         dms3 dn3 0
sc          0          dms3 dn3 0
wzmm        250         dseg3 dn3 16667
hzm         0.79        dres3 dn3 1.0
ls          500.00      homo3 dn3 1.0
rf1         12488.9      homo3 dn3 1.0
rf2         11615.9      1b   PROCESSING 0.50
rf3         100.000     wfile
nm          100.000     wfile
cdc         math       not used
ph          math       not used
werr       werr
wexp       wexp
wbs        wbs
wnt        wnt
  
```

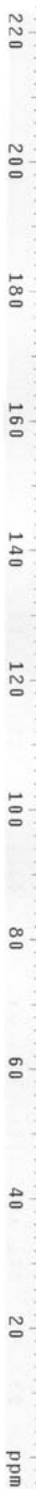

Dong\_VIV\_P109\_noesy1D  
 Pulse Sequence: noesy1D\_da  
 Solvent: CDCl3  
 Ambient temperature  
 INOVA-600 "nu600"  
 Relax. delay 2.000 sec  
 Pulse 90.0 degrees  
 Mixing 0.400 sec  
 Width 1.332 sec  
 Width 8000.0 Hz  
 248 Repetitions  
 OBSERVE HI, 599.8393022 MHz  
 DATA PROCESSING  
 Line broadening 0.7 Hz  
 FT size 32768  
 Total time 1 hr, 19 min, 0 sec

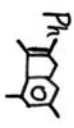

(10)

NOE Experiment

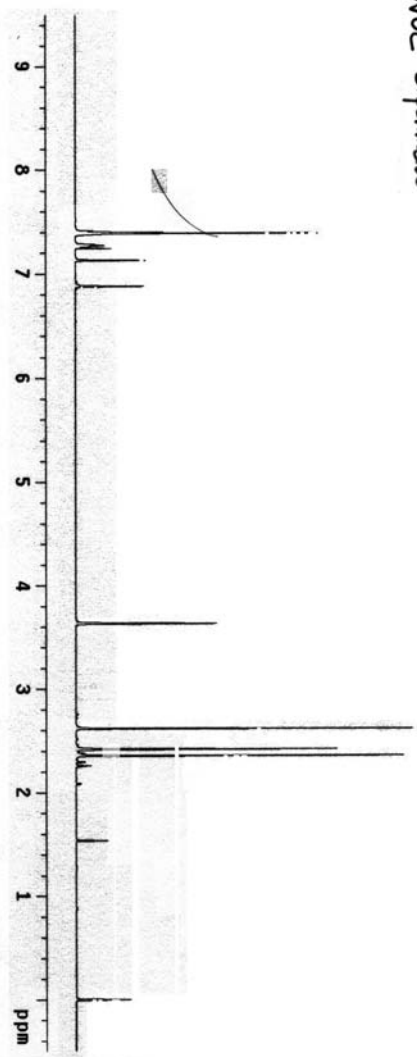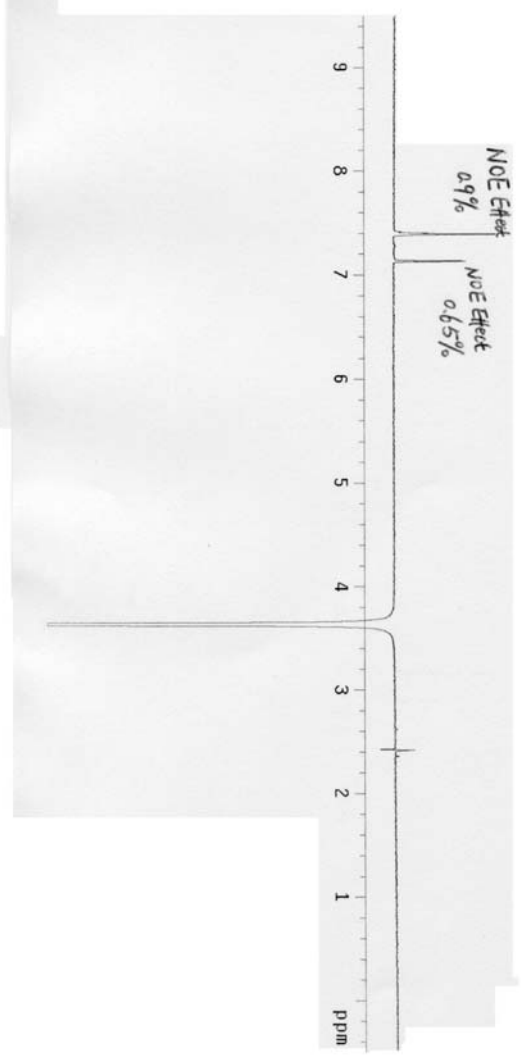

Dong\_VIV\_P105.

exp1 s2pu1

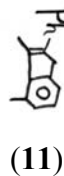

<sup>1</sup>H NMR

| date       | SAMPLE   | DEC. & VT  |
|------------|----------|------------|
| Oct 3 2006 | 3.2006   | 599.942    |
| solvent    | CDC13    | H1         |
| file       | exp      | 30         |
| sfreq      | 599.942  | mm         |
| at         | 1.892    | mm         |
| np         | 30272    | dseq       |
| sw         | 8000.0   | dres       |
| fb         | 4000     | homo       |
| bs         | 4        | DEC2       |
| tpwr       | 59       | dfrq2      |
| pw         | 6.0      | dn2        |
| d1         | 3.000    | dpwr2      |
| tof        | 0        | dof2       |
| nt         | 8        | dm2        |
| st         | 8        | dmf2       |
| atlock     | not used | dseq2      |
| gain       | not used | dres2      |
| fl         | n        | homo2      |
| in         | y        | dfrq3      |
| dp         | n        | dn3        |
| hs         | n        | dpwr3      |
| sp         | -994.3   | dof3       |
| wp         | 799.5    | dm3        |
| vs         | 95       | dmf3       |
| sc         | 220      | dfrq3      |
| hsc        | 0.49     | dres3      |
| hscnm      | 181.91   | homo3      |
| rfi        | 994.8    | PROCESsing |
| th         | 0        | vtfile     |
| ins        | 5        | proc       |
| nm         | 3.000    | fn         |
|            |          | math       |
|            |          | not used   |
|            |          | f          |
|            |          | ft         |
|            |          | werr       |
|            |          | wexp       |
|            |          | wds        |
|            |          | wnt        |
|            |          | wft        |

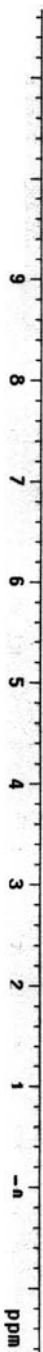



Dong\_VIV\_P105\_noesy1D  
 Pulse Sequence: noesy1D\_1  
 Solvent: CDCl3  
 Ambient Temperature  
 INOVA-600 400000  
 Relax. delay 2.000 sec  
 Pulse 90.0 degrees  
 Mixing time 1.000 sec  
 Acq time 1.038 sec  
 Width 8000.0 Hz  
 440 repetitions  
 OBSERVE H1, 599.3392935  
 DATA PROCESSING  
 Line broadening 0.7 Hz  
 FT size 32768  
 Total time 1 hr. 20

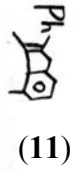

NOE Experiment

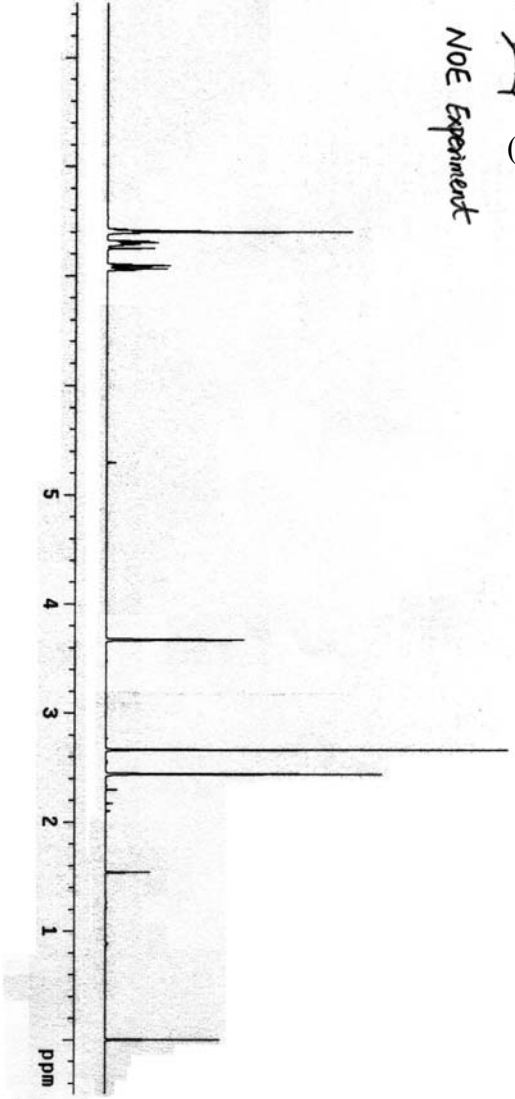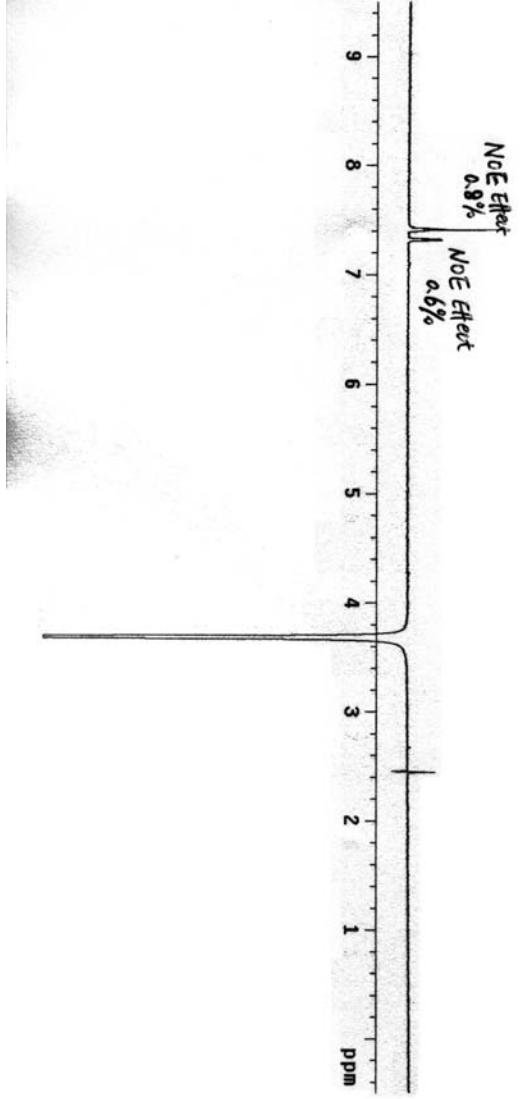

Doong\_VIV\_p112\_1H

expt s2pu1

| SAMPLE   | date   | DEC. & VI |
|----------|--------|-----------|
| 6.2006   | dfreq  | 599.942   |
| CDC13    | dn     | H1        |
| exp      | dpwr   | 3.0       |
| df       | dozf   | 0         |
| 599.942  | dm     | mm        |
| H1       | damm   | C         |
| 1.832    | dmt    | 200       |
| 30272    | dsesq  | 1.0       |
| 80000    | drss   | n         |
| 4000     | homo   | n         |
| 59       | dfreq2 | 0         |
| 6.0      | dn2    | 1         |
| 3.000    | dpwr2  | 0         |
| 0        | dozf2  | n         |
| 8        | dms2   | n         |
| 8        | dms2   | 200       |
| 0        | dms2   | C         |
| 0        | dsesq2 | 1.0       |
| not used | drss2  | n         |
| homo2    | homo2  | 1.0       |
| DEC3     | DEC3   | 0         |

DISPLAY

| SP     | WP    | VS  | SC | WC  | hazm   | fz1    | fz2 | fn | proc     | math | WARR | WOSP | Wnt | Wft |
|--------|-------|-----|----|-----|--------|--------|-----|----|----------|------|------|------|-----|-----|
| 1004.2 | 799.5 | 119 | 30 | 220 | 181.31 | 1004.0 | 0   | fn | not used | f    |      |      |     |     |
| nm     | cdc   | ph  |    |     |        |        |     |    |          |      |      |      |     |     |

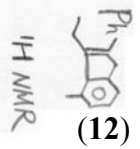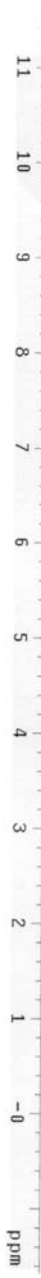



exp2 s2pu1

```

SAMPLE      DEC. & VI
date Oct 6 2006  dfrq 599.942
solvent Oct CDC13  dn   H1
file ACQUISITION exp dpwr 39
          exp dof   0
sfreq 150.871  dm   mny
          130.871  dm   mny
          111.871  dm   mny
at 1.300  dmf 16667
np 90272  dseq
sw 34707.2  dres 1.0
fb 19000  homo
bs 8  DECD
cpwr 8  dfrq2  DECD
          61  dfrq2  0
          3.000  dpwr2  1
          3017.4  dof2  0
nt 10000  dma2  n
          2752  dmm2  c
atlock not used  dmf2 16667
gain not used  dseq2 1.0
          n  dres2
          n  homo2
          n  DECD
          n  dn3
          Y  dfrq3  0
          n  dn3
          n  dpwr3  1
          n  dof3  0
          n  dma3  n
          n  dmm3  c
          n  dres3  16667
          76  dm3
          250  dseq3
          2.28  dres3  1.0
          500.00  homo3
          12498.7 1b  PROCESSING 0.50
          11615.8 1b  wffile
          10  wffile
          100.000  f1  not used
          mm  cdc  ph  math
          werr
          wexp
          wbs
          wnt

```


  
**(12)**
  
 13C NMR

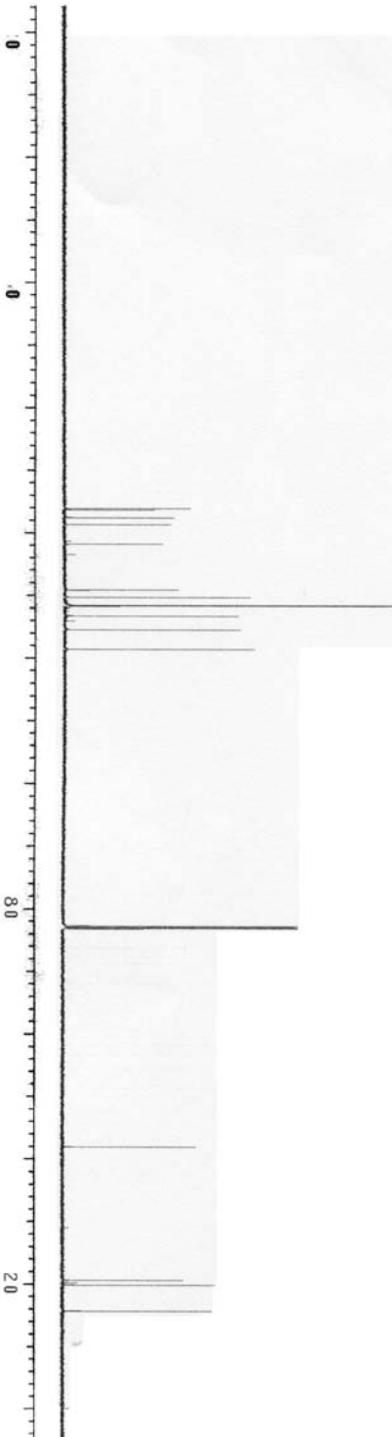

exp1 s2pul

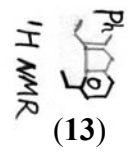

exp1 s2pul  
 SAMPLE  
 date Oct 20 2006  
 solvent CDCl3  
 F1 ACQUISITION exp  
 sfrq 599.942  
 ln H1  
 at 1.892  
 np 30272  
 sw 8000.0  
 ds 4000  
 tpwr 59  
 pw 6.0  
 dl 3.000  
 lof 0  
 nt 8  
 ct 8  
 clock n  
 gain not used  
 flags n  
 in n  
 dp Y  
 hs n  
 DISPLAY  
 sp -989.7  
 wp 7999.5  
 vs 94  
 sc 30  
 wc 220  
 hzmm 0.07  
 ls 227.39  
 rfd 394.1  
 th 37  
 ins 6.000  
 nm math  
 ph not used  
 WFT  
 WEXP  
 WMT  
 WFT

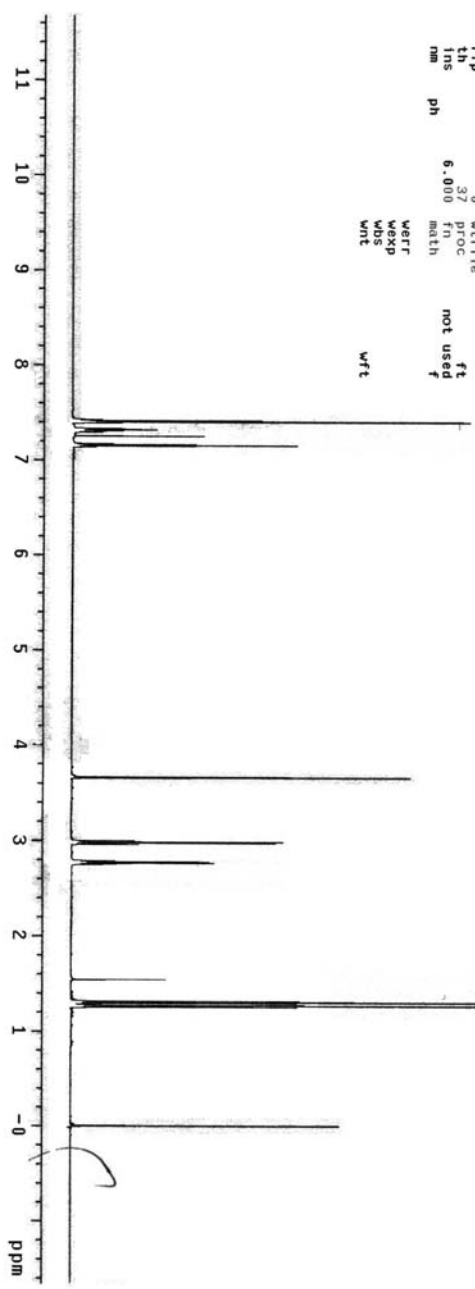

Dong\_VIV\_P121\_02\_13C

exp2 s2pu1

|         |             |        |           |         |       |
|---------|-------------|--------|-----------|---------|-------|
| date    | Oct 20 2006 | dfreq  | DEC. & VI | 599.942 | H1    |
| solvent | CDC13       | dn     |           |         | 39    |
| file    | ACQUISITION | exp    | dpwr      |         | 16667 |
| sfreq   | 150.871     | dd     | nmv       |         | 1.0   |
| tn      | 1.300       | dmm    |           |         |       |
| at      | 90272       | dseq   |           |         |       |
| sw      | 34707.2     | dres   |           |         |       |
| fb      | 19000       | homo   |           |         |       |
| dsprf   | 6           | dfreq2 | DEC2      | 0       |       |
| dpwr    | 6           | dn2    |           |         |       |
| dl      | 3.000       | dpwr2  |           | 1       |       |
| tof     | 3017.4      | dotf2  |           | 0       |       |
| nt      | 5000        | dmm2   |           | n       |       |
| ct      | 912         | dmm2   |           | C       |       |
| alock   | not used    | dseq2  |           | 16667   |       |
| gain    | not used    | dres2  |           |         |       |
| l1      | Y           | homo2  | DEC3      | 1.0     |       |
| in      | n           | dfreq3 |           | 0       |       |
| dp      | Y           | dn3    |           |         |       |
| hs      | n           | dpwr3  |           | 1       |       |
| sp      | DISP        | dotf3  |           | 0       |       |
| wp      | -876.5      | dmm3   |           | n       |       |
| v1      | 34706.5     | dseq3  |           | 16667   |       |
| sc      | 0           | dres3  |           |         |       |
| wc      | 250         | homo3  |           | 1.0     |       |
| hzmm    | 34.35       | PROCES |           |         |       |
| rs      | 500.00      | math   |           |         |       |
| rft1    | 12492.8     | math   |           |         |       |
| rft2    | 11615.9     | math   |           |         |       |
| rft3    | 100.000     | math   |           |         |       |
| ins     |             | math   |           |         |       |
| nm      |             | math   |           |         |       |

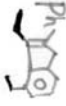

<sup>13</sup>C NMR

(13)

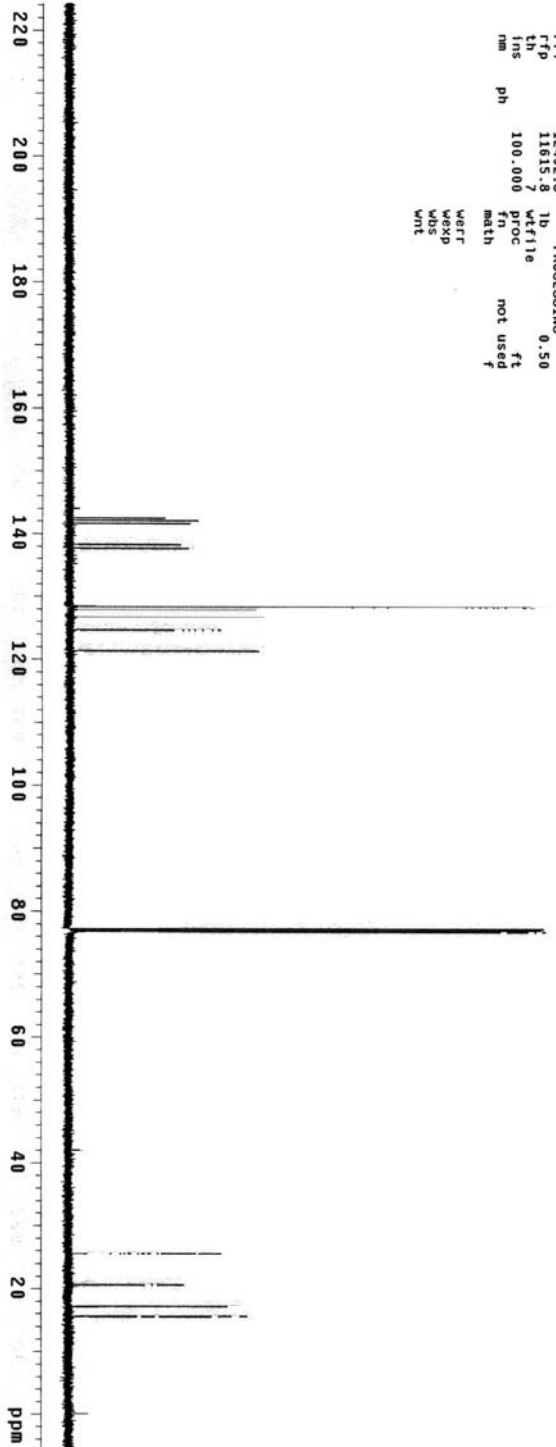

Donq\_VIV\_P121\_G2\_noesy10  
 Pulse Sequence: noesy10\_da  
 Solvent: CDCl3  
 Ambient temperature  
 INOVA-600 "u600"  
 Relax--delay 2.000 sec  
 Pulse 90.0 degrees  
 Mixing 0.400 sec  
 Acq. time 1.892 sec  
 F1den 6000.0 MHz  
 F2den 6000.0 MHz  
 OBSERVE H1 599.9392965 MHz  
 DATA PROCESSING  
 Line broadening 0.7 Hz  
 FT size 32768  
 Total time 1 hr, 28 min, 11 sec

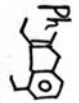

(13)

NOE Experiment

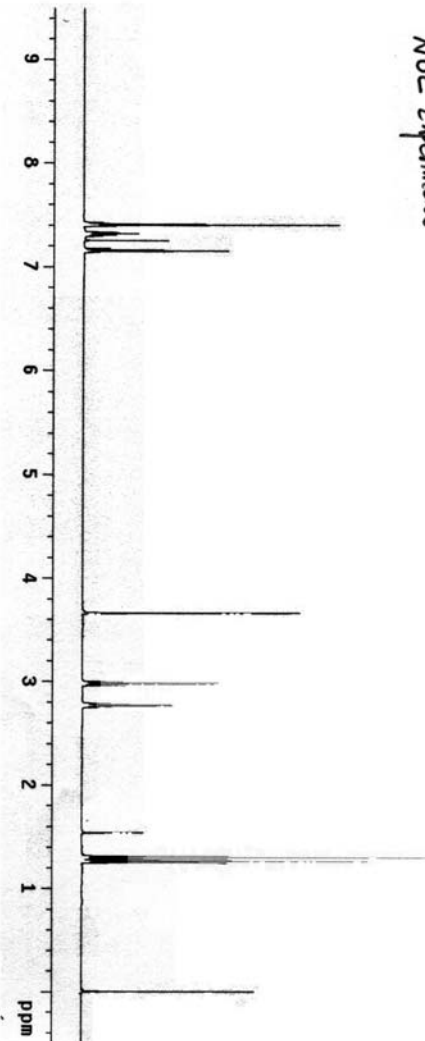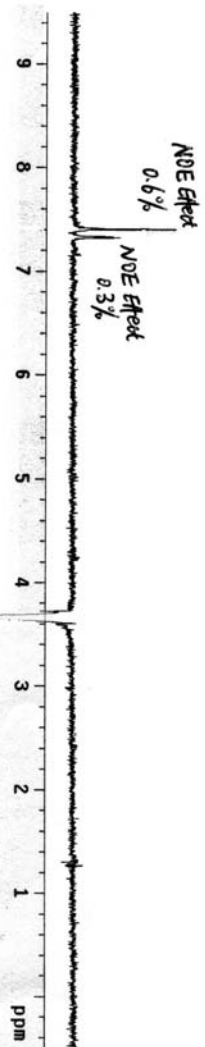

Dong\_VIV\_P117\_G2\_1H

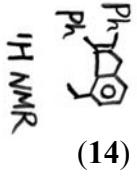

```
expl s2pau1
SAMPLE DEC. & VI
date Oct13 2006 dfrq 599.942
solvent CDC13 dn H1
file ACQUISITION exp dpwr 30
sfreq 599.942 dof 30
in H1 dnm mnc
at 1.892 dmf 200
np 30272 dseq
sw 8000.0 dres 1.0
fb 4000 homo
dspr 5 4 dfrq2 DEC2 0
nu 6 0 dn2
di 3.000 dpwr2 1
tof 0 dof2 0
nt 8 dnm2 n
ct 8 dnm2 n
alock not used n dmf2 200
gain FLAGS n dseq2 1.0
l1 n homo2 DEC3 0
in Y dfrq3
dp nm dn3
hs DISPLAY
sp -983.7 dpwr3 1
wp 7993.3 dof3 0
vc 0 dnm3 n
sc 0 dmf3 200
wcc 220 dseq3
h2mm 181.91 homo3 PROCESSING 1.0
f1 394.1
f1p 0 wfile
f1m 0 pfile
f1s 3.000 math not used f
rm cdc ph
```

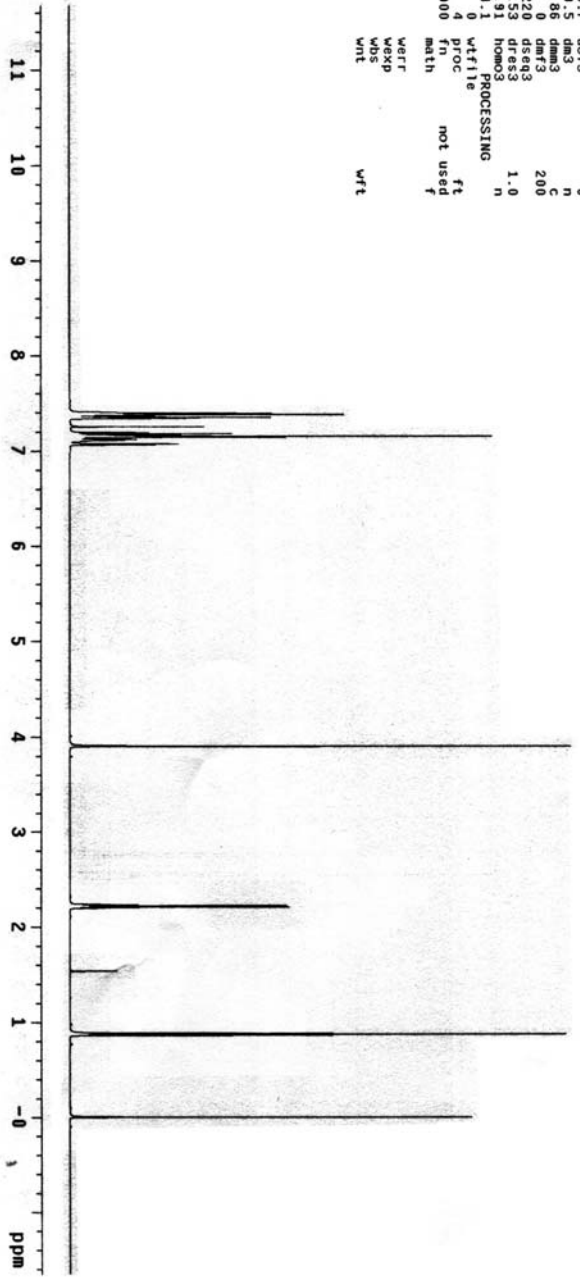

Dong\_VIV\_p117\_02\_130

exp2 s2pu1

```

SAMPLE DEC. & VT
date Oct 6 2006 dfreq 599.942
solvent CDC13 dn H1
file exp dpwr H1
ACQUISITION dof 39
sfrq 150.871 dm nmy
fn C13 dnm nmy
nc 1400 dnm 16667
sw 50272 dres 1.0
sb 34707.2 dres 1.0
fb 19000 homo n
bs 8
tpwr 61 dfreq2 DEC2 0
pw 6.0 dn2
d1 3.000 dpwr2 1
lof 3017.4 dof2 1
nt 10000 dm2 n
t1 019 dmf2 c
clock not used dres2 16667
gain not used dres2 1.0
ll n homo2 n
in y dfreq3 DEC3 0
dp n dn3
hs DISPLAY nm dn3 1
SP 7888.5 dpwr3 1
VP 31706.8 dof3 0
WC 70 dm3 n
SC 0 dmf3 c
WC 250 dres3 16667
hzm 138.83 dres3 1.0
IS 500.00 homo3
rf1 12504.9 lb PROCESSING 0.50
rfp 11615.8 wfl1e
th 10 p1oc not used f
ins 10 m1n
nm cdc ph math

```

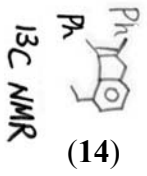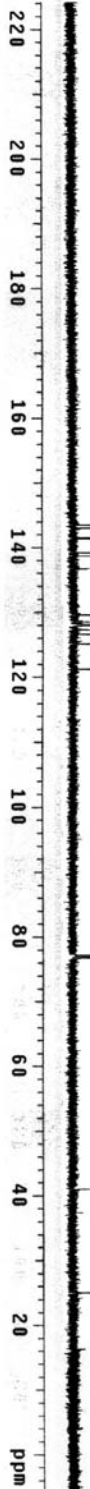

Dong\_VIV\_p116\_g2\_1H

expl s2pnt1

| SAMPLE            | DEC. & VT         |
|-------------------|-------------------|
| date Oct 6 2006   | dfrq 599.942      |
| solvent CDCl3     | dn HI             |
| file ACQUISITION  | exp dprvr 30      |
| sfreq 599.942     | dot 0             |
| tn HI             | dmm mnm           |
| at 1.892          | dntf 200          |
| np 30272          | dresq 200         |
| sw 8000.0         | dres 1.0          |
| fb 4000           | homo n            |
| bs 4              | DEC2 0            |
| tpvr 59           | dfrq2 0           |
| pw 6.0            | dn2 0             |
| d1 3.000          | dpvr2 1           |
| tof 0             | dot2 0            |
| nt 8              | dm2 n             |
| ct 8              | dmm2 C            |
| atlock n          | dmt2 200          |
| gain not used     | dresq2 1.0        |
| flags n           | dres2 n           |
| l1 n              | homo2 n           |
| in n              | dfrq3 DEC3 0      |
| dp y              | dn3 n             |
| hs nm             | dprvr3 1          |
| sp DISPLAY -933.3 | dot3 0            |
| wp 7999.5         | dms3 n            |
| vs 97             | dmm3 C            |
| sc 0              | dmt3 200          |
| wc 220            | dresq3 1.0        |
| h2mm 0.99         | dres3 n           |
| rs 181.91         | homo3 n           |
| rfl 993.8         | wtfile PROCESSING |
| fn 0              | proc not used     |
| tn 4              | math n            |
| ins cdc ph 2.000  | verf wft          |
|                   | weyp              |
|                   | wbs               |
|                   | wnt               |

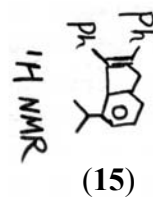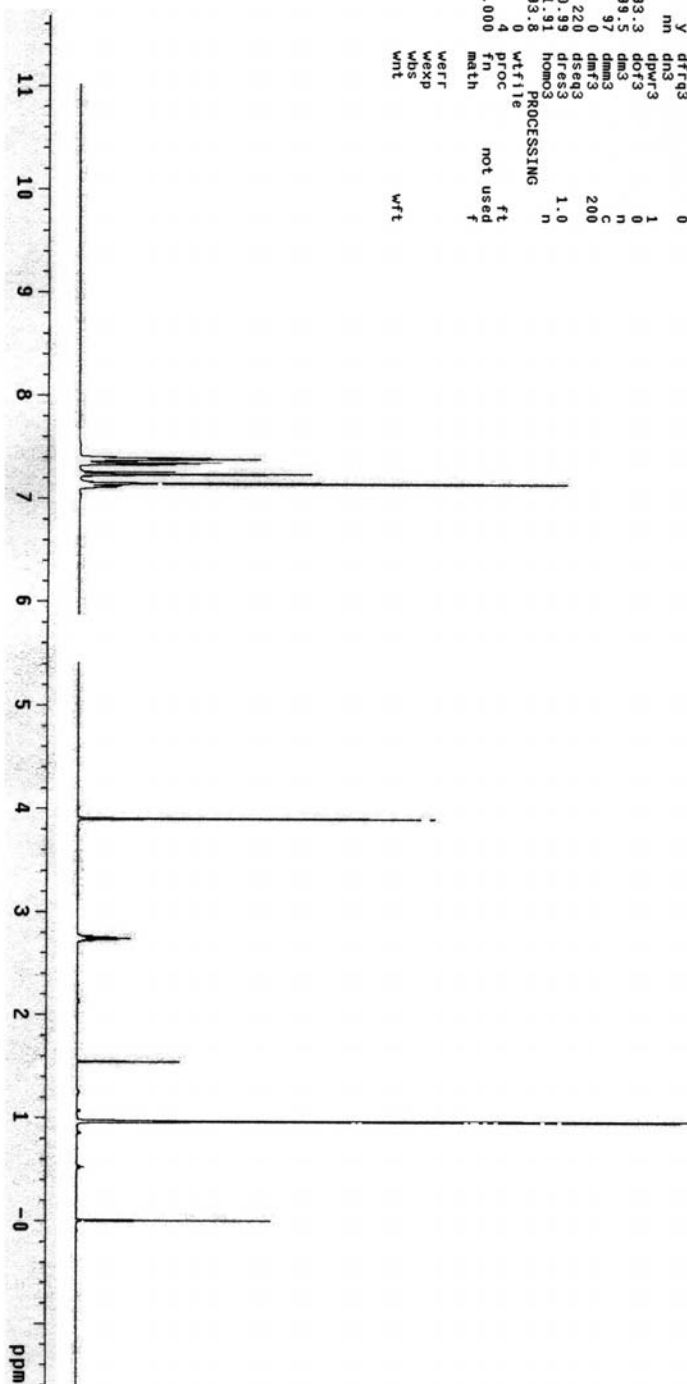

exp2 s2pu1

```

SAMPLE      DEC. & VT
date Oct 6 2006  dfrq 599.942
solvent CDCl3   dn   H1
file ACQUISITION exp  dpr 39
           150.871  dm  31
           C13     dm  16687
           at 1.300  dmf  W
           sw 90272  dseq 16687
           fb 34707.2 dres 1.0
           ds 19000  homo 1.0
           dpwr 8    DEQ2
           dp 61    dfrq2 0
           dt 3.00  dm2r2 1
           tof 3017.4 dof2 0
           nt 20000  dm2  n
           ct 568    dma2  C
           atlock n  dmf2  16687
           gain not used dseq2
           l1 n     dres2  1.0
           ln n     homo2  n
           ns Y     dfrq3  0
           dp n     dm3r3  1
           DISPLAY -882.9 dof3 0
           wp 34706.6 dm3  n
           vs 76    dma3  C
           sc 0     dmf3  16687
           wc 250   dseq3  1.0
           hzmm 138.83 dres3  n
           rs 500.00 homo3  1.0
           rft 12499.3 lb  PROCESSING
           rfp 1819.8  lf  0.50
           th 100.000  wf file
           rms cdc ph  math  not used
           werr
           wexp
           wds
           wnt

```

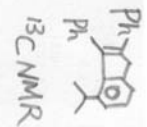

(15)

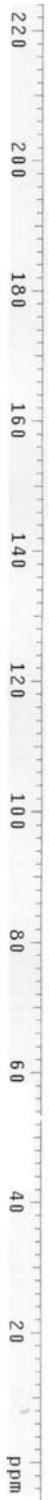



D0ng\_PIV\_121\_1H

exp1 s2pul1

|         |               |           |            |
|---------|---------------|-----------|------------|
| date    | Jun 30 2006   | DEC. & VT | 599.942    |
| solvent | CDCl3         | dn        | M1         |
| file    | exp           | dpwr      | 30         |
| str     | 599.942       | dm        | 0          |
| acq     | 1.891         | dmr       | 200        |
| np      | 30272         | dres      | 1.0        |
| sw      | 8000.0        | homo      | n          |
| fb      | 4000          | homo      | n          |
| bs      | 32            | DEC2      | 0          |
| tpwr    | 59            | dftrq2    | 0          |
| pw      | 5.5           | dn2       | 1          |
| dl      | 0             | qpwr2     | 0          |
| tof     | 0             | doz2      | n          |
| td      | 8             | dmz2      | n          |
| cl      | 8             | dmz2      | n          |
| atlock  | n             | dmsq2     | 200        |
| gain    | not used      | dres2     | 1.0        |
| 11      | n             | homo2     | n          |
| in      | n             | homo2     | n          |
| dp      | y             | dftrq3    | DEC3       |
| hs      | nn            | dn3       | 0          |
| sp      | DISPLAY-981.2 | qpwr3     | 1          |
| vd      | 7993.2        | doz3      | 0          |
| ve      | 109           | dmz3      | 0          |
| sc      | 35            | dmr3      | 200        |
| wc      | 215           | dres3     | 1.0        |
| hzmm    | 1.76          | dres3     | 1.0        |
| rs      | 33.57         | homo3     | n          |
| rftl    | 991.7         | homo3     | n          |
| lfs     | 0             | wtfile    | PROCESSING |
| lfs     | 0             | proc      | not used   |
| lfs     | 3             | match     | f          |
| nm      | 12.000        | match     | f          |
| nm      | cdc           | ph        | 12.000     |
| nm      | cdc           | ph        | 12.000     |
| werr    |               | werr      |            |
| wexp    |               | wexp      |            |
| wbs     |               | wbs       |            |
| wnt     |               | wnt       |            |
| wft     |               | wft       |            |

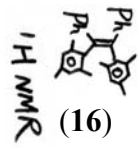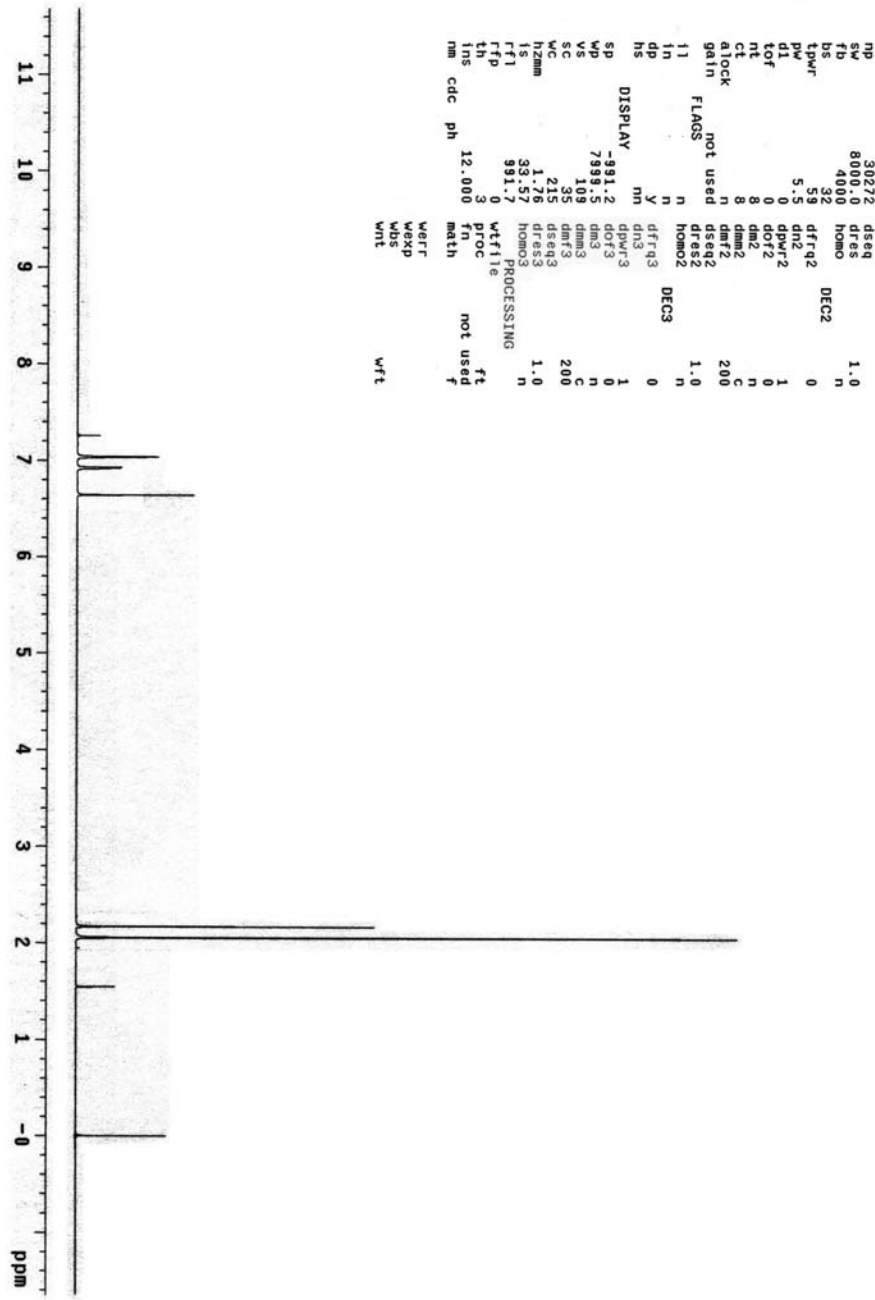

Dong\_PIV\_121\_13C

exp2 szpul1

|             |             |        |            |         |
|-------------|-------------|--------|------------|---------|
| date        | Jun 30 2006 | dfrq   | DEC. & VT  | 539.942 |
| solvent     | CDCl3       | dn     | H1         | 39      |
| file        | exp         | dpwr   | 0          | nny     |
| strq        | 150.871     | dof    | 0          | w       |
| ACQUISITION |             | dm     |            |         |
| tn          | 1.523       | dmm    |            | 16667   |
| te          | 8.029       | dms    |            | 1.0     |
| nu          | 34707.2     | dfe4   |            | 1.0     |
| sw          | 19000       | dfe8   |            | n       |
| fb          |             | homo   |            | n       |
| bs          | 8           | DEC2   |            | 0       |
| tpwr        | 61          | dfrq2  |            | 0       |
| pl          | 6.6         | dn2    |            | 1       |
| d1          | 3.000       | dpwr2  |            | 0       |
| tof         | 3817.4      | dof2   |            | 0       |
| nt          | 10000       | dm2    |            | n       |
| cl          | 328         | dmm2   |            | c       |
| clock       | not used    | dms2   |            | 16667   |
| gain        | n           | dfe2   |            | 1.0     |
| 11          | n           | dfe42  |            | 1.0     |
| in          | n           | dfe82  |            | n       |
| dp          | y           | homo2  | DEC3       | 0       |
| hs          | nn          | dn3    |            | 1       |
| DISPLAY     | -874.6      | dpwr3  |            | 0       |
| sp          | 34706.6     | dof3   |            | n       |
| wp          | 67          | dms3   |            | c       |
| vs          | 0           | dmm3   |            | 16667   |
| sc          | 251         | dfe3   |            | 1.0     |
| hc          | 138.83      | dfe43  |            | 1.0     |
| h2mm        | 500.00      | dfe83  |            | n       |
| 15          | 12491.0     | homo3  | PROCESSING | n       |
| rf1         | 11615.8     | wtfile |            | ft      |
| th          | 9           | proc   | not used   | f       |
| 1ns         | 100.000     | fn     |            |         |
| nm          | cdc         | math   |            |         |
| ph          |             | weff   |            |         |
|             |             | wekp   |            |         |
|             |             | nds    |            |         |
|             |             | mts    |            |         |

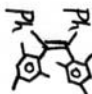

(16)

<sup>13</sup>C NMR

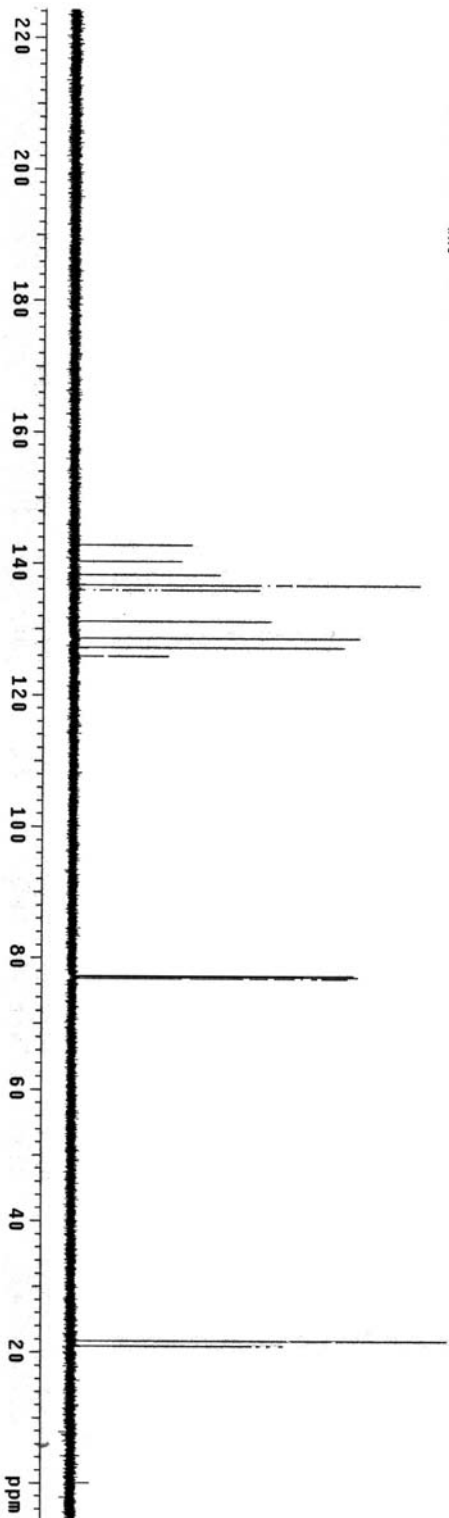

Dong\_VIII\_P157\_G1\_1H  
 expt szput

SAMPLE DEC. & VT  
 date Apr 19 2008 dfrq 599.942  
 solvent CDC13 dn H1  
 file ACQUISITION exp dpar 30  
 sfrq 599.942 dm mnc  
 tn HI dmm 200  
 at 1.892 dmf  
 np 30272 dseq  
 sw 8000.0 dres  
 fb 4000 homo 1.0  
 bs 32  
 tpar 59 dfrq2 DEC2  
 dy 5.9 dm2 0  
 dv 0 ddf2 1  
 tof 0 dm2 1  
 nt 8 dmm2 n  
 ct 8 dmm2 n  
 alock n dmf2 200  
 gain not used dseq2  
 flags n dres2 1.0  
 11 n homo2 n  
 in n dfrq3 DEC3  
 dp y dm3 0  
 ds DISPLAY nm dms 1  
 sp -994.4 ddf3 1  
 wp 7999.5 dms 1  
 vs 83 dmm3 n  
 sc 35 dmf3 200  
 wc 215 dseq3  
 hzmm 37.16 dres3 1.0  
 ts 33.57 homo3  
 ffl 994.9 wffile PROCESSING  
 tpr 9 pproc  
 tns cdc ph 100.000 math not used  
 ft  
 warr  
 wexp  
 wbs  
 wnt wft

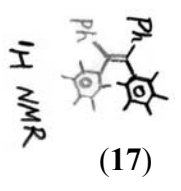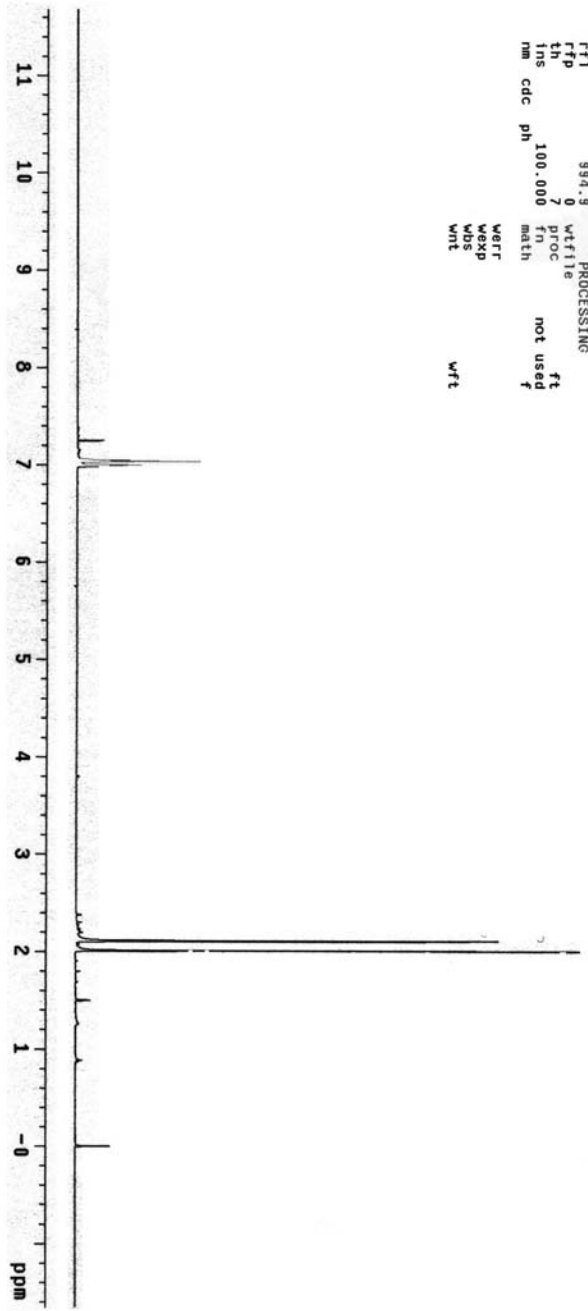

Dong\_VIII\_P157\_G1\_13C

exp2 s2pu1

```

SAMPLE DEC. & VT
date Apr 18 2006 dfrq 539.942
solvent CDCl3 dn H1
file ACQUISITION exp dpr 39
sfreq 150.871 dm dot 0
in C13 dnm mny W
at 1.300 dmf 15877
np 30272 dseq 1.0
fh 34707.2 dres 1.0
bs 1300.8 homo 25.0
tpwr 61 temp
pw 6.0 dfrq2 DEC2 0
d1 3.000 dn2
lof 3017.4 dpwr2 1
nt 1000 dot2 0
ct 256 dm2 n
atlock n dm2 n
gain not used 1667 C
11 n dseq2 1.0
1n n dres2
1n n homo2 DEC3 0
hs DISPLAY mn dfrq3 0
sp -875.7 dpwr3 1
wp 34706.6 dot3 0
vs 57 dm3 n
sc 0 dnm3 C
wc 220 dm3 1667
hznm 157.76 dseq3
f1 570.09 dres3 1.0
f1 1248.4 homo3
th 11615.7 wfile PROCESSING n
ins cdc ph 100.000 proc not used f
nm math fn

```

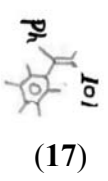

<sup>13</sup>C NMR

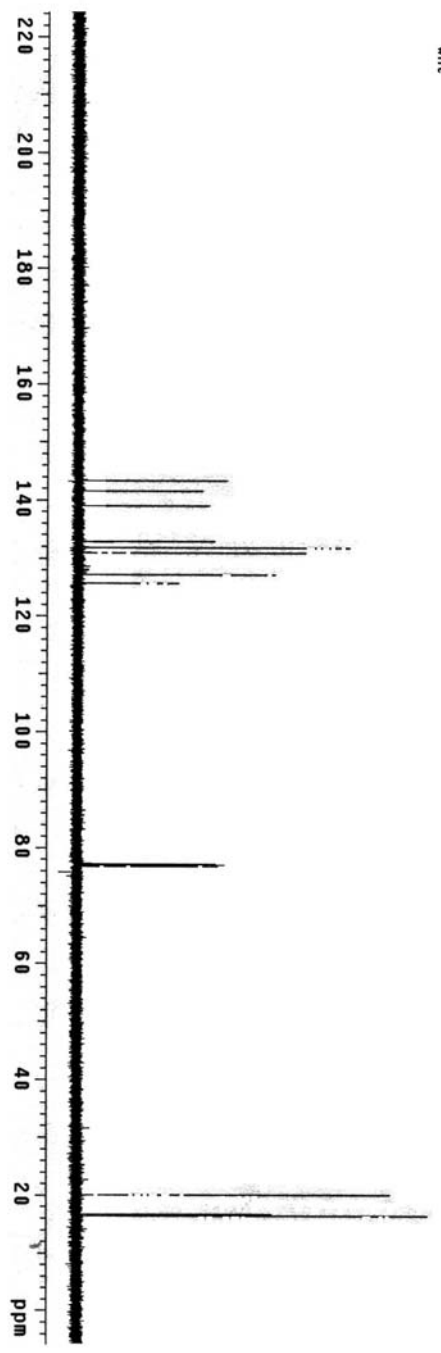

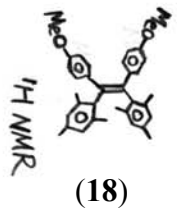

```

exp1 s2pu1
SAMPLE      date Jun 8 2006  dfrq DEC. & VT 598.942
solvent     Jun 8 2006  CDC13  dn          HI
F1 ACQUISITION  exp  dpr          30
F2 ACQUISITION  exp  dpr          30
sfrq       598.942  dn          0
tn         HI      dm          mnr
at         1.892   dseq       200
np         30272   dres       200
sw         8000.0  homo       1.0
fb         4000    homo
us         32      dfrq2     DEC2  0
dprf       5.3    dnr2      1
dn         0      ddf2      1
tof        8      dm2       n
nt         8      dm2       n
ct         8      dm2       n
alock      not used  dseq2     200
gain       not used  dres2     200
flags      not used  dres2     1.0
ll         n      homo2     n
ln         n      homo2     n
dp         y      dfrq3     DEC3  0
hs         y      dprf3     1
DISPLAY    -888.2   dprf3     1
wp         7999.5  dm3       n
vs         110    dm3       n
sc         35     dm3       n
wc         215    dseq3     200
hzmm       0.84   dres3     1.0
f1         398.7  homo3     n
f2         398.7  homo3     n
f3         398.7  homo3     n
proc       wftfile
nm cdc ph 2.000  math      not used
warrt
wexp
wds
wnt
wft

```

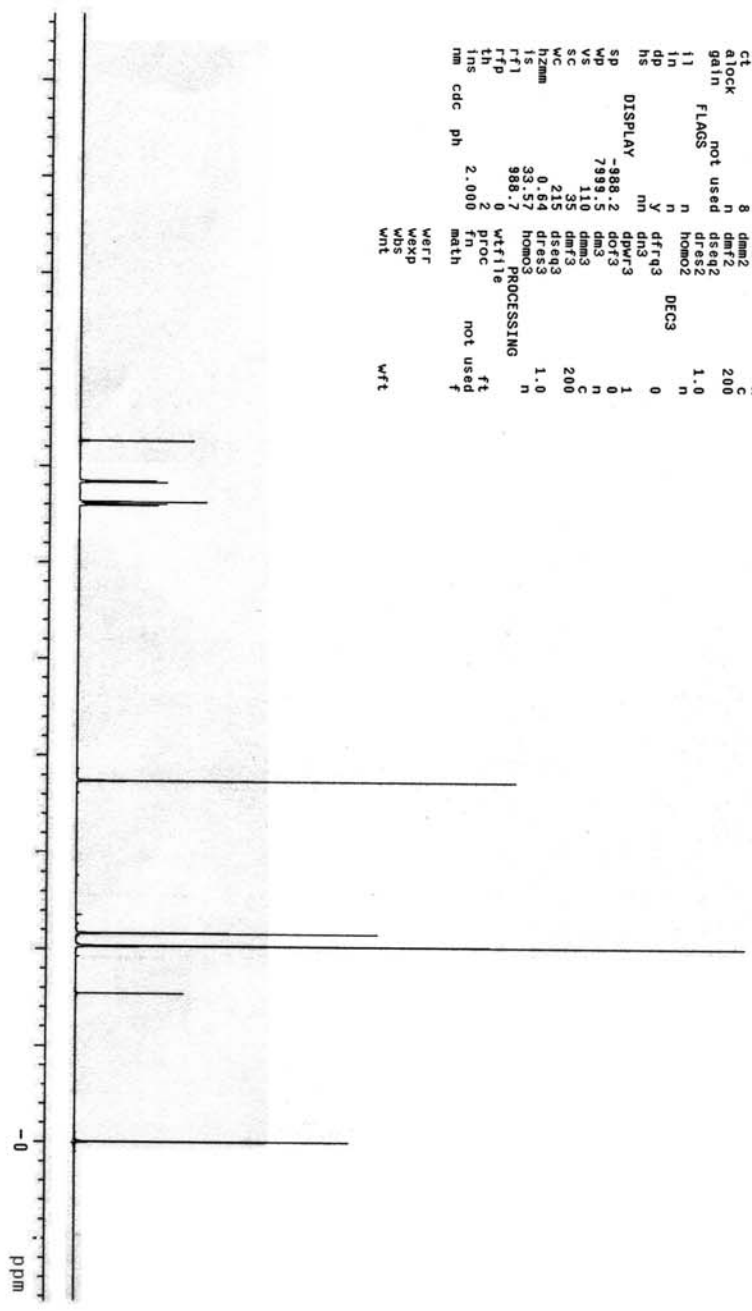

Doneg\_PIV

```

SAMPLE 7 2006 dfr VT 599 42
date Jun CDC13 dfr H1
solvent CDC13 dfr H1
F1 ACQUISITION exp dfr 30
sfreq 150.871 dm dfr 0
tn C13 dmm W 7
at 1.300 dmf
np 90272 dseq
sw 34707.2 dres
td 13008 homo
tpwr 61 dfrq2
pw 6.0 dn2
d1 3.000 dpwr2
tof 3017.4 dof2
nt 30000 dm2
ct 1328 dmm2
atlock n dm2
gain not used dseq2
11 n dres2
in n homo2
dp n
hs Y dfrq3
DISPLAY nm dn3
sp -972.8 dpwr3 1
wp 34706.2 dms3 0
vc 0 dmf3 16667
sc 250 dseq3
wzmm 138.83 dres3 1.0
f1 500.00 homo3 PROCESSING
rf1 12489.2 wif1e
tn 11615.8 proc
ms 000 math not used
nm cdc

```

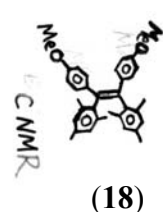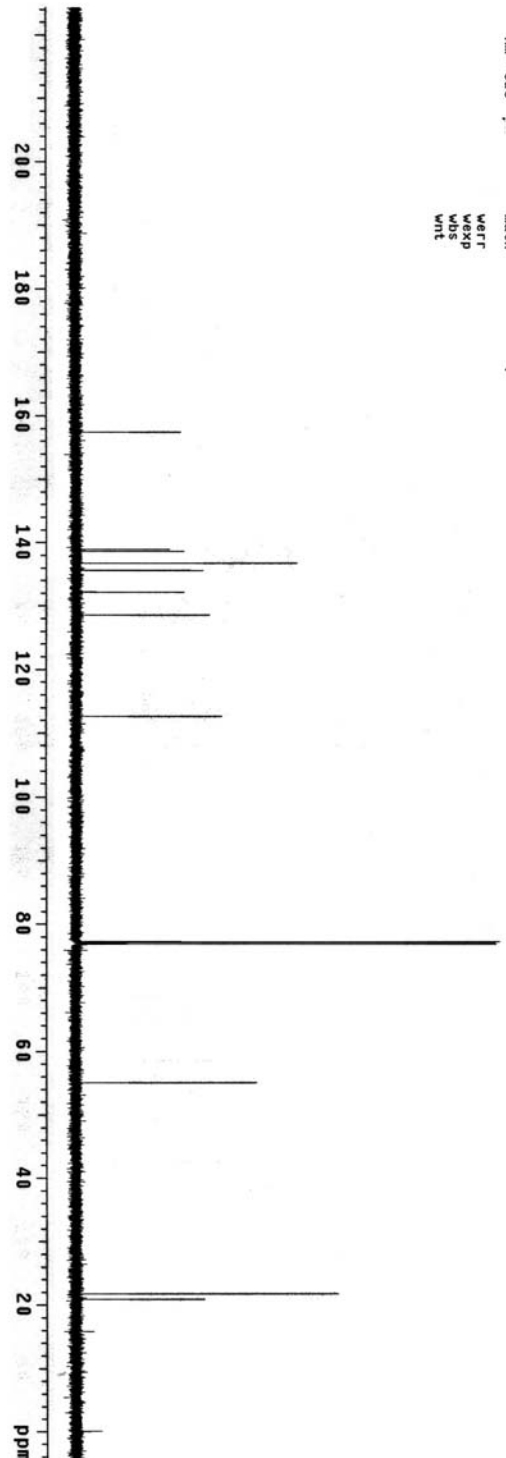



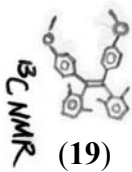

Dong\_PIV\_113\_13C  
exp2 s2pu1

| date        | SAMPLE   | 8 2006 | dfreq      | DEC. & VT | 599.942  |
|-------------|----------|--------|------------|-----------|----------|
| solvent     | Jun      | CDCl3  | dn         |           | 38       |
| ft          |          | CDCl3  | dpwr       |           | 38       |
| ACQUISITION | exp      |        | dof        |           | 0        |
| sfreq       | 150.871  | dm     |            | nyy       | W        |
| tn          | C13      | dmm    |            |           |          |
| at          | 1.300    | dmf    |            |           | 16667    |
| np          | 90272    | dseq   |            |           |          |
| sw          | 34707.2  | dres   |            |           | 1.0      |
| fd          | 19000    | homo   |            |           | n        |
| bs          | 5        | dfreq2 | DEC2       |           | 0        |
| dpwr        | 6.0      | dp2    |            |           |          |
| dl          | 3.000    | dpwr2  |            |           | 1        |
| tof         | 9817.4   | dof2   |            |           | 0        |
| nt          | 30000    | dm2    |            |           | n        |
| ct          | 1256     | dmm2   |            |           | C        |
| atlock      | n        | dmf2   |            |           | 16667    |
| gain        | not used | dseq2  |            |           |          |
| FLAGS       | n        | dres2  |            |           | 1.0      |
| 11          | n        | homo2  | DEC3       |           | 0        |
| 1n          | y        | dfreq3 |            |           |          |
| dp          |          | dp3    |            |           |          |
| hs          |          | dpwr3  |            |           | 1        |
| DISPLAY     | nh       | dof3   |            |           | 0        |
| sp          | -871.4   | dm3    |            |           | n        |
| wp          | 34706.6  | dmm3   |            |           | C        |
| vs          | 100      | dmf3   |            |           | 16667    |
| sc          | 0        | dseq3  |            |           |          |
| wc          | 250      | dres3  |            |           | 1.0      |
| hzmm        | 198.83   | dres3  |            |           | n        |
| 12          | 12987.0  | homo   | PROCESSING |           |          |
| 13          | 11615.8  | wtfile |            |           |          |
| ffp         | 11       | proc   |            |           |          |
| th          | 11       | fn     |            |           | not used |
| lms         | 100.000  | math   |            |           | f        |
| nm          | cdc      | ph     |            |           |          |
|             |          | werr   |            |           |          |
|             |          | wexp   |            |           |          |
|             |          | wds    |            |           |          |
|             |          | wnt    |            |           |          |

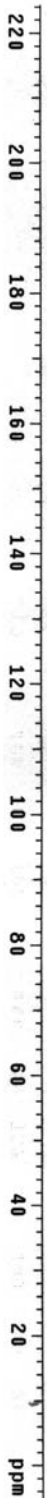



Dong\_P111\_103\_1H

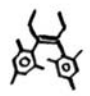

1H NMR (20)

```

exp4 s2pui
SAMPLE Nov 22 2005 DEC. & VI 599.942
date Nov 22 2005 dfrq dn H1
solvent CDC13 dn H1
file /data/hu/data~ dpwr 30
/dong/Nov2205_Dong~ dof 0
_P111_103_1H_11d dm nmh
_P111_103_1H_11d dm nmh
ACQUISIT 599.942 dmf 200
sfrq HI dseg
tn HI dseg
at 1.892 dres
nd 30272 homo
sw 8000.0 DECE2
fb 4000 dfrq2
ds 32 dnt2
lpwr 32 dpwr2
wv 5.3 dnt2
d1 0 dnt2
tof 0 dnt2
nt 16 dnt2
ct 16 dnt2
atlock n dres2
gain not used homo2
FLAGS not used DECE3
11 n dfrq3
11 n dnt3
11 y dnt3
hs nm dnt3
DISPLAY -990.2 dnt3
sp 7999.5 dnt3
vs 117 dnt3
sc 0 dnt3
WC 250 HOMOPROCESSING
Hzmm 32.250
f1 212.02 wfile
rfp 990.7 proc
th 0 fn
ins cdc ph 12.000 math
nm cdc ph Weir
Wexp
WDS
WNT wft

```

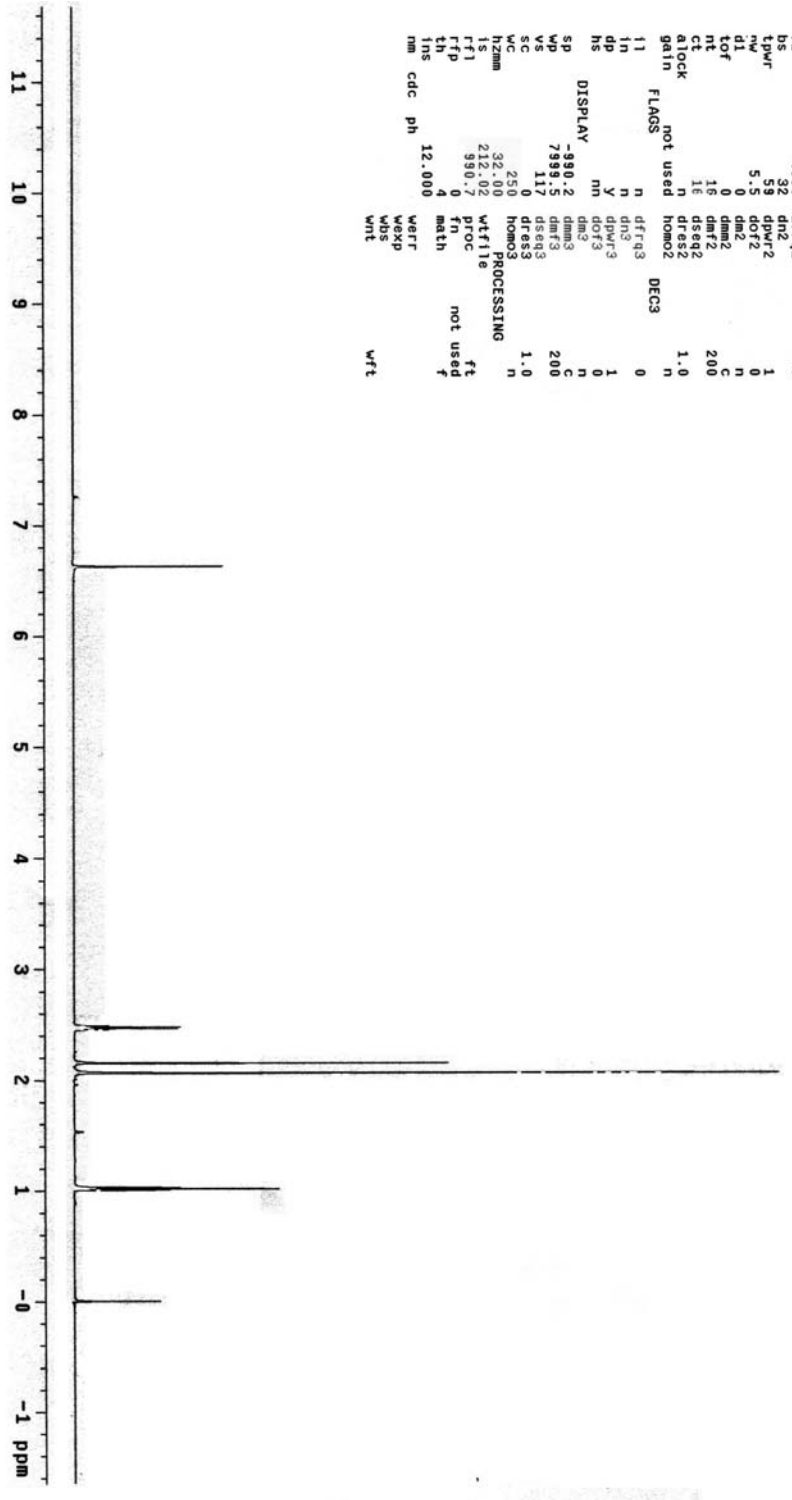

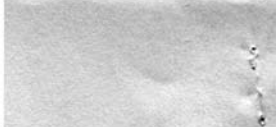

Dong\_P111\_103\_13C

expd s2pu1

```

SAMPLE          DEC. & VT
date Nov 22 2005 dfrq 599.942
solvent CCl3      dn      H1
file /data/hu/data~ dpwr 39
/hong/NOV2005/Dong~ dof 0
_P111_103_13C.fid dm      nny
_ACQUISITION 158.871 dnm  W
sfreq 158.871      dm      15877
at C13             dres  1.0
np 1.300           dres  1.0
sw 90272          homo  25.0
fb 34707.2       temp  25.0
bs 19000         dfrq2  0
tpwr 61          dn2  dpr2  1
pw 3.0           dn2  dpr2  1
td 3017.4        dn2  dpr2  n
nt 30000         dmf2  16667
ct 568          dmf2  16667
atlock n         dseq2  1.0
gain not used   dres2  1.0
flags          homo2  n
11 n            dfrq3  0
in n            dn3  dpr3  1
dp y           dn3  dpr3  1
ns Y           dof3  0
DISPLAY -871.3  dms  0
sp 34706.6      dms3  n
vs 76          dmf3  16667
sc 0           dmf3  16667
wc 225         dseq3  1.0
hzmm 154.25    dres3  n
rf1 12987.6    homo2PROCESSING
rfi 11815.8    wfile
th 11          fn      not used
ns 100.000    math  f
nm           werr
           wexp
           wds
           wnt

```


  
 BC NMR (20)

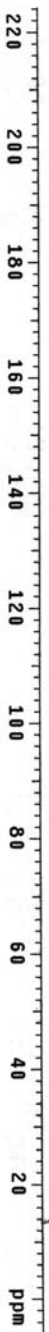

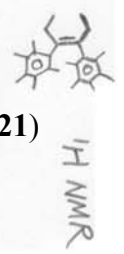

```

Donng_PIV_108_1H
exp1 szpui
SAMPLE DEC. & VT
date May 13 2006 dfrq 599.942
solvent CDCl3 dn H1
file exp dpwr 30
ACQUISITION dof 0
sfrq 599.942 dm mm
nu 1000000 dmf 200
at 1.892 dres 200
np 30272 dres 1.0
sw 8000.0 homo n
fb 4000 DECC2
bs 32 dfrq2 0
tpwr 59 dn2 1
pw 6.0 dn2 1
dl 3.000 dpwr2 1
lor 8 do2 0
hl 8 do2 0
ct 8 dms2 C
atlock n dsq2 200
gain not used dsq2 1.0
11 n homo2 n
in n dfrq3 DECC3 0
dp y dfrq3 0
hs DISPLAY nn dn3 1
sp -88.6 dpwr3 1
ve 789.5 dm3 n
sc 90 dms3 C
wc 220 dsq3 200
h2mm 36.36 dres3 1.0
is 343.34 homo3
rf1 889.1 WFFILE PROCESSING
rfp 0 WFFILE
ln 3 Proc
ns 3 Proc not used
nm cdc ph 12.000 math
werr werr
wexp wexp
wbs wbs
wnt wnt WFF
  
```

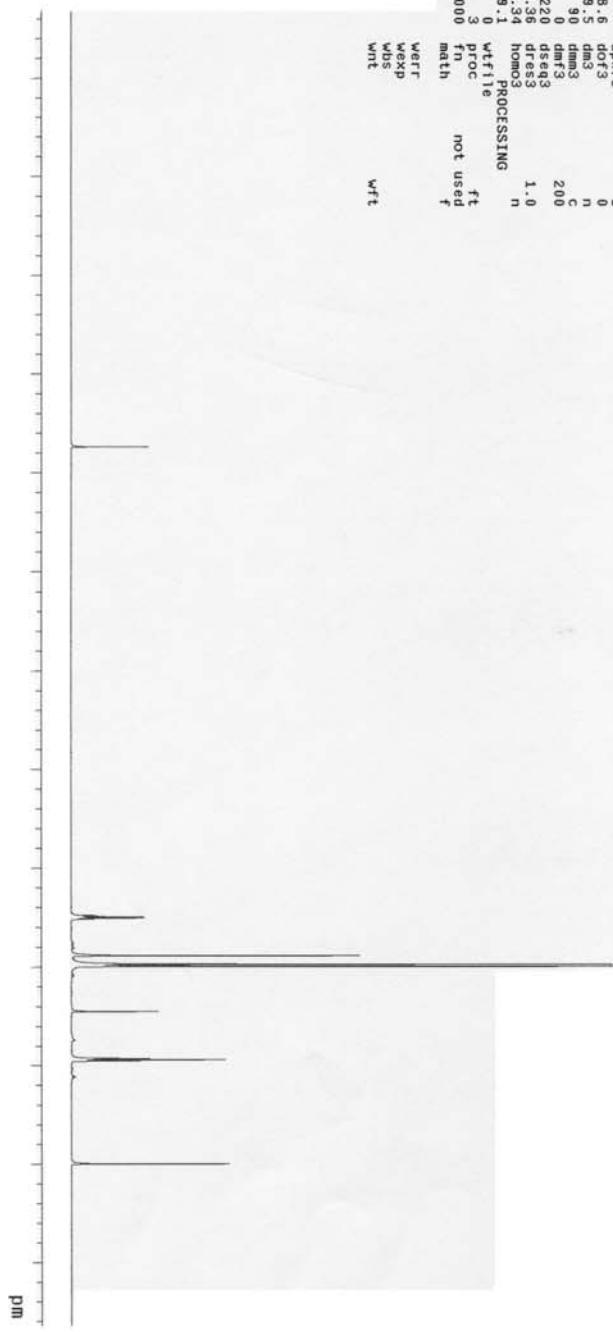

Dong\_PIV

exp2

| date    | SAMPLE      | May 13 2006 | dfreq | 142  |
|---------|-------------|-------------|-------|------|
| solvent | CDC13       | exp         | dn    | H1   |
| file    | ACQUISITION | exp         | dpwr  | 39   |
| sfreq   | 150.871     | dm          | dcf   | 0    |
| tn      | 1.300       | dmm         | nmv   | 17   |
| at      | 90272       | dsef        | dseq  | 0    |
| sw      | 34707.2     | dres        | homo  | n    |
| fb      | 19000       | homo        | homo  | n    |
| bs      | 8           | dfri        | dfri  | n    |
| tpwr    | 60          | dm2         | dm2   | 1    |
| dw      | 3.150       | dpf2        | dpf2  | 0    |
| tof     | 3017.4      | dm2         | dm2   | n    |
| nt      | 5000        | dmm2        | dmm2  | n    |
| ct      | 984         | dsef2       | dsef2 | 7    |
| atlock  | not used    | dres2       | dres2 | 0    |
| gain    | -LAGS       | homo2       | homo2 | n    |
| l1      | n           | dfq3        | dfq3  | DEC3 |
| l2      | n           | dfq3        | dfq3  | DEC3 |
| l3      | n           | dfq3        | dfq3  | DEC3 |
| l4      | n           | dfq3        | dfq3  | DEC3 |
| l5      | n           | dfq3        | dfq3  | DEC3 |
| l6      | n           | dfq3        | dfq3  | DEC3 |
| l7      | n           | dfq3        | dfq3  | DEC3 |
| l8      | n           | dfq3        | dfq3  | DEC3 |
| l9      | n           | dfq3        | dfq3  | DEC3 |
| l10     | n           | dfq3        | dfq3  | DEC3 |
| l11     | n           | dfq3        | dfq3  | DEC3 |
| l12     | n           | dfq3        | dfq3  | DEC3 |
| l13     | n           | dfq3        | dfq3  | DEC3 |
| l14     | n           | dfq3        | dfq3  | DEC3 |
| l15     | n           | dfq3        | dfq3  | DEC3 |
| l16     | n           | dfq3        | dfq3  | DEC3 |
| l17     | n           | dfq3        | dfq3  | DEC3 |
| l18     | n           | dfq3        | dfq3  | DEC3 |
| l19     | n           | dfq3        | dfq3  | DEC3 |
| l20     | n           | dfq3        | dfq3  | DEC3 |
| l21     | n           | dfq3        | dfq3  | DEC3 |
| l22     | n           | dfq3        | dfq3  | DEC3 |
| l23     | n           | dfq3        | dfq3  | DEC3 |
| l24     | n           | dfq3        | dfq3  | DEC3 |
| l25     | n           | dfq3        | dfq3  | DEC3 |
| l26     | n           | dfq3        | dfq3  | DEC3 |
| l27     | n           | dfq3        | dfq3  | DEC3 |
| l28     | n           | dfq3        | dfq3  | DEC3 |
| l29     | n           | dfq3        | dfq3  | DEC3 |
| l30     | n           | dfq3        | dfq3  | DEC3 |
| l31     | n           | dfq3        | dfq3  | DEC3 |
| l32     | n           | dfq3        | dfq3  | DEC3 |
| l33     | n           | dfq3        | dfq3  | DEC3 |
| l34     | n           | dfq3        | dfq3  | DEC3 |
| l35     | n           | dfq3        | dfq3  | DEC3 |
| l36     | n           | dfq3        | dfq3  | DEC3 |
| l37     | n           | dfq3        | dfq3  | DEC3 |
| l38     | n           | dfq3        | dfq3  | DEC3 |
| l39     | n           | dfq3        | dfq3  | DEC3 |
| l40     | n           | dfq3        | dfq3  | DEC3 |
| l41     | n           | dfq3        | dfq3  | DEC3 |
| l42     | n           | dfq3        | dfq3  | DEC3 |
| l43     | n           | dfq3        | dfq3  | DEC3 |
| l44     | n           | dfq3        | dfq3  | DEC3 |
| l45     | n           | dfq3        | dfq3  | DEC3 |
| l46     | n           | dfq3        | dfq3  | DEC3 |
| l47     | n           | dfq3        | dfq3  | DEC3 |
| l48     | n           | dfq3        | dfq3  | DEC3 |
| l49     | n           | dfq3        | dfq3  | DEC3 |
| l50     | n           | dfq3        | dfq3  | DEC3 |
| l51     | n           | dfq3        | dfq3  | DEC3 |
| l52     | n           | dfq3        | dfq3  | DEC3 |
| l53     | n           | dfq3        | dfq3  | DEC3 |
| l54     | n           | dfq3        | dfq3  | DEC3 |
| l55     | n           | dfq3        | dfq3  | DEC3 |
| l56     | n           | dfq3        | dfq3  | DEC3 |
| l57     | n           | dfq3        | dfq3  | DEC3 |
| l58     | n           | dfq3        | dfq3  | DEC3 |
| l59     | n           | dfq3        | dfq3  | DEC3 |
| l60     | n           | dfq3        | dfq3  | DEC3 |
| l61     | n           | dfq3        | dfq3  | DEC3 |
| l62     | n           | dfq3        | dfq3  | DEC3 |
| l63     | n           | dfq3        | dfq3  | DEC3 |
| l64     | n           | dfq3        | dfq3  | DEC3 |
| l65     | n           | dfq3        | dfq3  | DEC3 |
| l66     | n           | dfq3        | dfq3  | DEC3 |
| l67     | n           | dfq3        | dfq3  | DEC3 |
| l68     | n           | dfq3        | dfq3  | DEC3 |
| l69     | n           | dfq3        | dfq3  | DEC3 |
| l70     | n           | dfq3        | dfq3  | DEC3 |
| l71     | n           | dfq3        | dfq3  | DEC3 |
| l72     | n           | dfq3        | dfq3  | DEC3 |
| l73     | n           | dfq3        | dfq3  | DEC3 |
| l74     | n           | dfq3        | dfq3  | DEC3 |
| l75     | n           | dfq3        | dfq3  | DEC3 |
| l76     | n           | dfq3        | dfq3  | DEC3 |
| l77     | n           | dfq3        | dfq3  | DEC3 |
| l78     | n           | dfq3        | dfq3  | DEC3 |
| l79     | n           | dfq3        | dfq3  | DEC3 |
| l80     | n           | dfq3        | dfq3  | DEC3 |
| l81     | n           | dfq3        | dfq3  | DEC3 |
| l82     | n           | dfq3        | dfq3  | DEC3 |
| l83     | n           | dfq3        | dfq3  | DEC3 |
| l84     | n           | dfq3        | dfq3  | DEC3 |
| l85     | n           | dfq3        | dfq3  | DEC3 |
| l86     | n           | dfq3        | dfq3  | DEC3 |
| l87     | n           | dfq3        | dfq3  | DEC3 |
| l88     | n           | dfq3        | dfq3  | DEC3 |
| l89     | n           | dfq3        | dfq3  | DEC3 |
| l90     | n           | dfq3        | dfq3  | DEC3 |
| l91     | n           | dfq3        | dfq3  | DEC3 |
| l92     | n           | dfq3        | dfq3  | DEC3 |
| l93     | n           | dfq3        | dfq3  | DEC3 |
| l94     | n           | dfq3        | dfq3  | DEC3 |
| l95     | n           | dfq3        | dfq3  | DEC3 |
| l96     | n           | dfq3        | dfq3  | DEC3 |
| l97     | n           | dfq3        | dfq3  | DEC3 |
| l98     | n           | dfq3        | dfq3  | DEC3 |
| l99     | n           | dfq3        | dfq3  | DEC3 |
| l100    | n           | dfq3        | dfq3  | DEC3 |

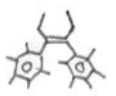

(21)

<sup>13</sup>C NMR

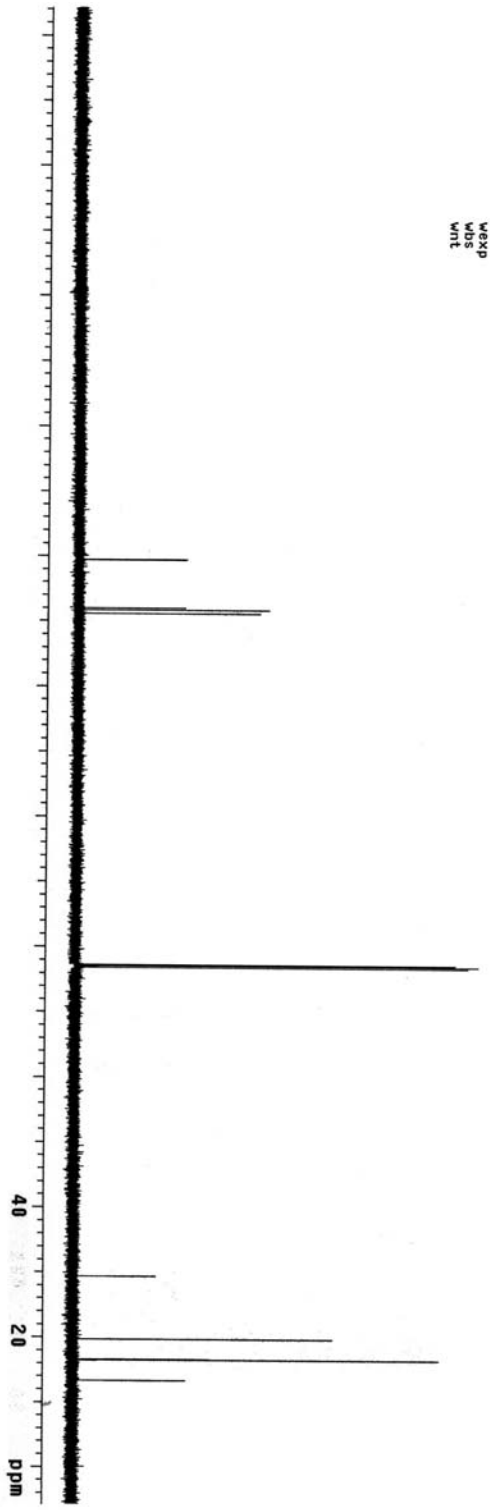

Dong\_VIV\_P34\_1H

exp1 s2pul1

```

SAMPLE      date Jun 21 2006  DEC. & VT  539.942
solvent     Jun 21 2006  CDC13  dn
file        exp dof      dpwr      30
ACQUISITION 599.942  dm          0
           tn          H1 dnm      nmn
           dt          1.692  dmf      C
           sp          3272  dseq     200
           fb          8000  hres     1.0
           bs          4000  homo     n
           tpwr        58    dfrq2     DEC2
           dl          0     dn2      0
           tof         0     dpwr2    1
           nt          16    dof2     0
           ct          16    dm2      n
           atlock     not used  dmf2     C
           gain       not used  dseq2    200
           fl         not used  dres2    1.0
           in         n        hres2     n
           in         n        homo2     n
           dp         n        y dfrq3   DEC3
           hs         n        dn3      0
DISPLAY     -993.5  dpwr3    1
           wp         799.5  dof3     0
           vs         93    dm3      n
           sc         0     dnm3    C
           hc         250   dmf3     200
           hzmm       3280  dseq3    1.0
           is         18.72  hres3    n
           rfp        994.6  homo     n
           th         0     wtfile   n
           ins        23    proc     n
           nm         6.000  fn       not used
           ph         0     math     f
           werr       WEXP
           wds        WNT
           wnt        WFT

```

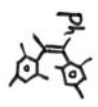

<sup>1</sup>H NMR

(22)

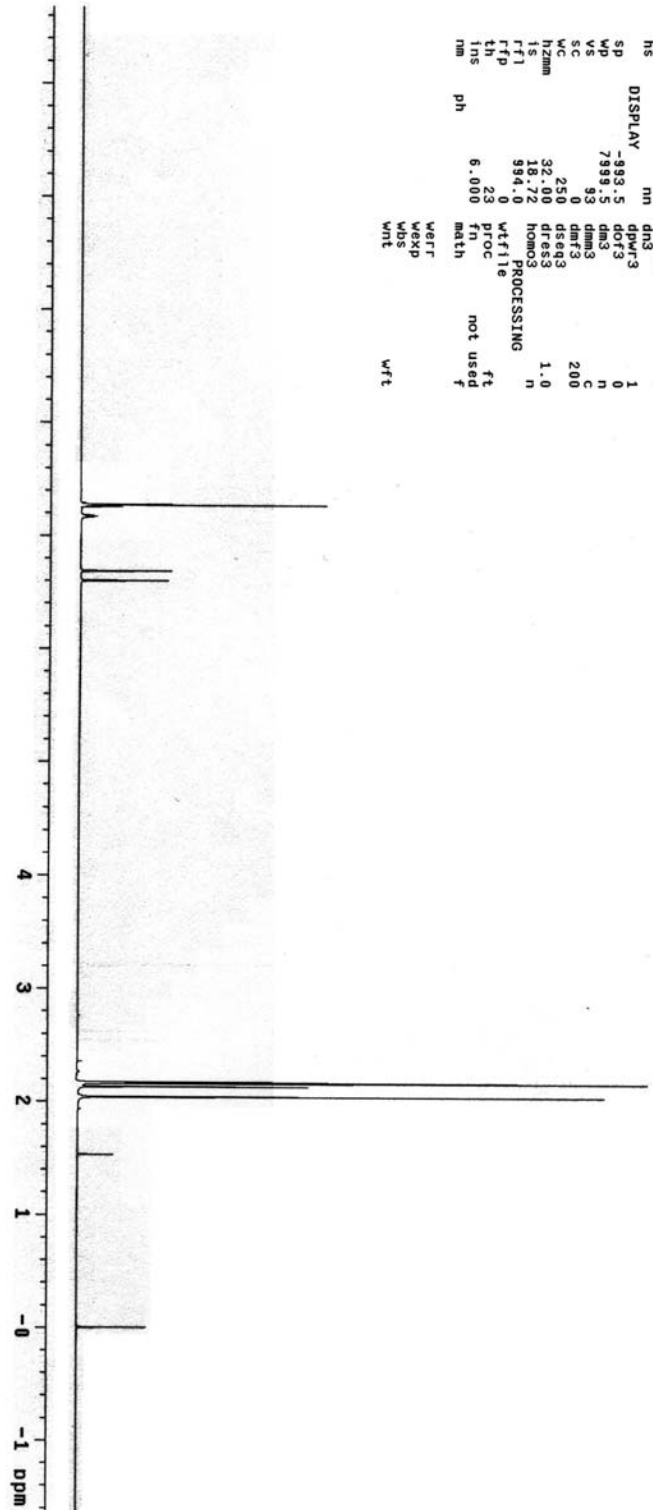

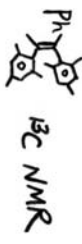

(22)

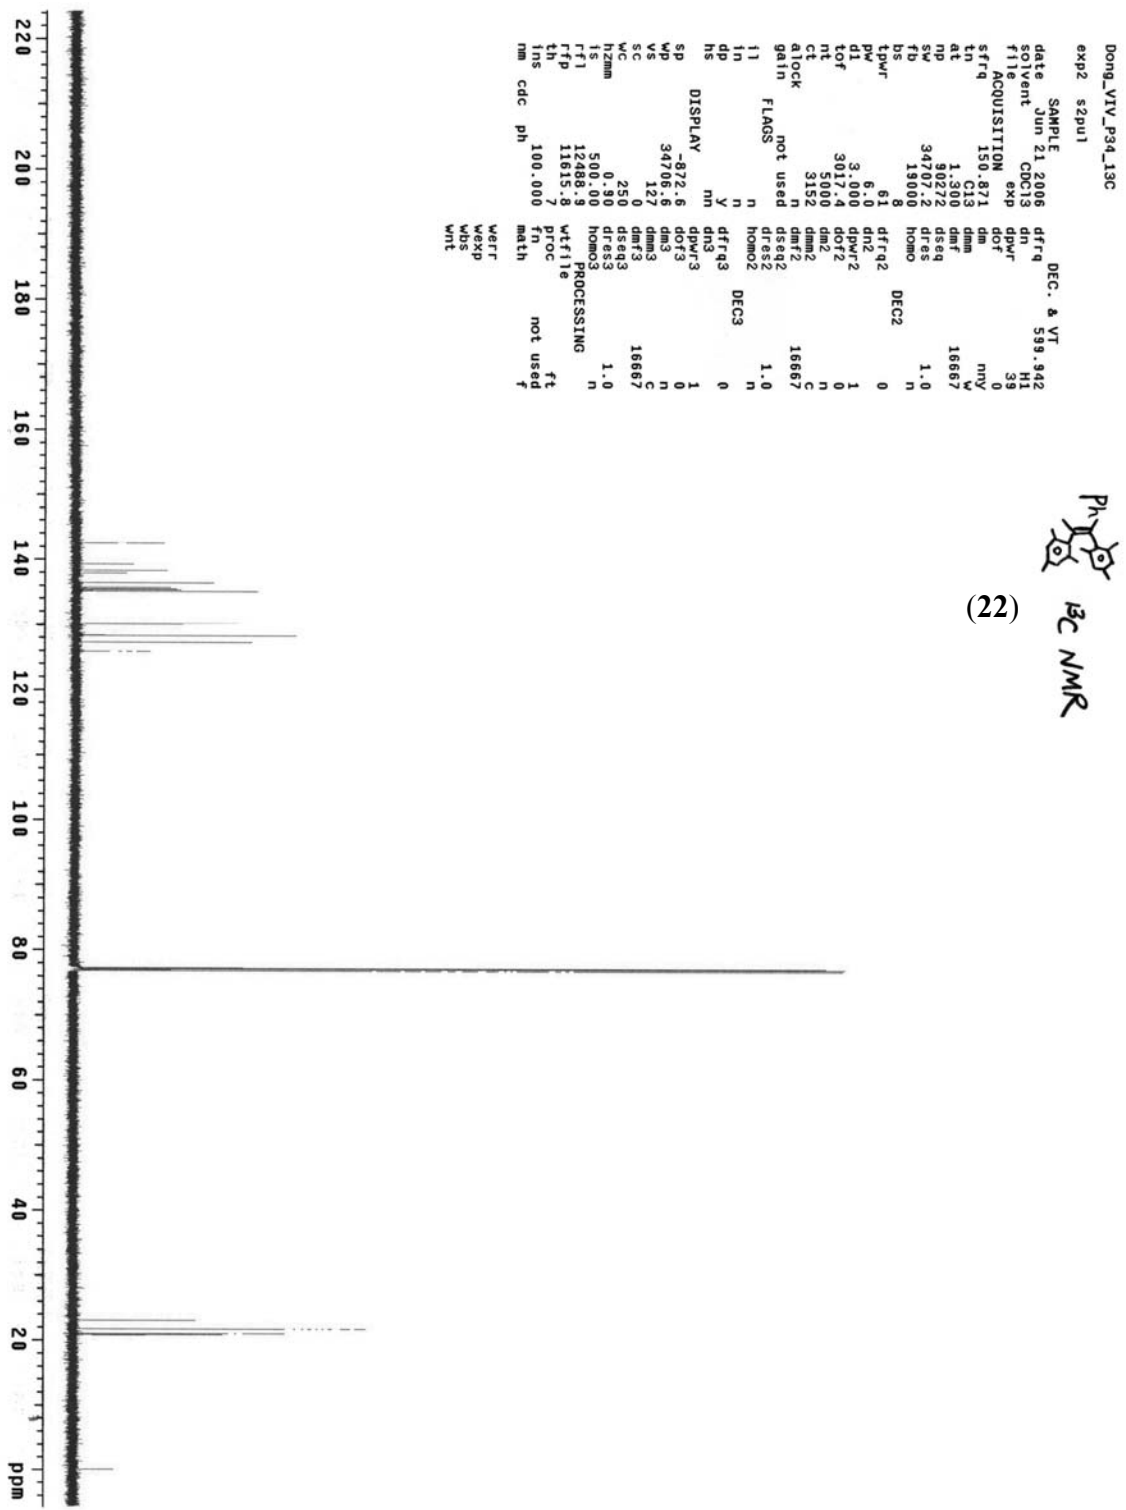

```

Donng_VIV_P34_13C
exp2 s2pu1
SAMPLE DEC. 8 VT
date Jun 21 2006 dfrc 539.942
solvent Jun 21 CDC13 dn H1
file ACQUISITION exp dpwr 39
sfrc 150.871 dm nny 0
fn 133 dnm w 16667
ns 50272 dfr 1.0
sw 34707.2 dres 1.0
fb 18000 homo
bs 8
tpwr 61 dfrc2 DEC2 0
pw 6.0 dn2
d1 3.000 dpwr2 1
lof 3017.4 dof2 0
nt 5000 dms2 n
rl 5152 dnm2 c
atlock not used dres2 16667
gain FLAGS n homo2 1.0
i1 n dfrc3 DEC3 0
in y dfrc3
dp nm dn3
hs DISPLAY -872.6 dpwr3 1
sp -872.6 dof3 0
wp 34706.9 dms3 n
vz 122 dmr3 c
sc 250 dmr3 16667
wc 250 dres3
hzmm 0.90 homo3 PROCESSING 1.0
ts 500.00 vffile
rf1 12488.9 vproc
th 11615.8 tr not used f
ins 100.000 math
nm cdc ph
  
```

00mg\_PIV\_116\_1H  
expi szpul

SAMPLE Jun 30 2006 DEC. & VT  
solvent CDC13 exp dn HI  
file ACQUISITION exp dpwr 30  
sfrq 599.942 dm 0  
tn 1.81 dmm nmn  
dd 30272 deag c  
sw 8000.0 dres 200  
fb 4000 homo 1.0  
bs 32 DECD  
tpwr 59 dfrq2 0  
pv 5.5 dn2  
dl 0 dpwr2 1  
tof 0 dof2 0  
nt 8 dm2 n  
ct 8 dmm2 c  
atlock n dmfr2 200  
gain not used dres2 1.0  
l1 n dres3  
in n homo2 DECD  
dn y dfrq3 0  
hs DISPLAY nm dn3  
sp -997.1 dpwr3 1  
wp 7999.5 dof3 0  
vs 90 dmm3 n  
sc 35 dmf3 c  
wc 215 dseq3 200  
hzmin 0.62 dres3  
ls 33.57 homo3 PROCESSING 1.0  
rfp 997.6 wffile  
th 3 proc  
ins 9 fn  
nm cdc ph 6.000 math not used f

werr  
wexp  
wbs  
wnt  
wfl

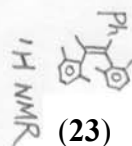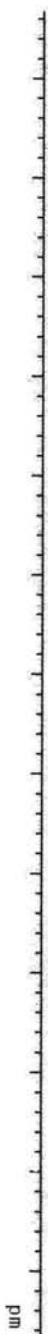

Dong\_PTV\_116\_13C  
exp2 szput1

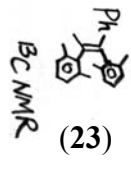

SAMPLE DEC. & VT  
date Jun 14 2006 dfrq 599.942  
file C038 dfrq 31  
ACQUISITION exp dfrq 31  
sfrq 150.871 dm 0  
tn C15 dnm my  
at 1.390 dmf 16667  
sp 1.272 dseq 1.0  
fb 3470.0 dms 1.0  
bs 19000 homo  
tpwr 54 dfrq2 DEC2 0  
pw 6.0 dn2  
dl 3.000 dpwr2 1  
tof 3017.4 dot 0  
ct 20000 dms 1  
atlock n dmf2  
gain not used dseq2 16667  
FLAGS not used dres2 1.0  
11 n dfrq3 DEC3 0  
1n y dfrq3  
dp nm dms  
hs DISPLAY -873.1 dot3 1  
sp 34706.6 dms 0  
wp 162 dnm3 n  
vs 0 dmf3 C  
sc 250 dseq3 16667  
wc 1.22 dfrq3 1.0  
12mm 500.000 homo  
rf1 12489.4 lb PROCESSING  
th 11615.8 8 wtf file 0.50  
fns 100.000 8 proc  
nm cdc ph fn math not used  
f

Wtfr  
Wexp  
Wds  
Wnt

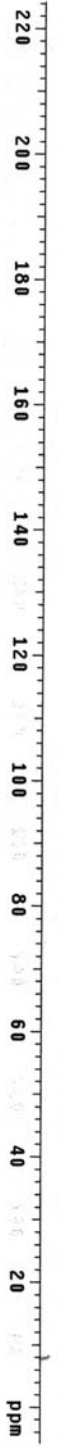



Donng\_PTV\_116\_noesy1D  
 Pulse Sequence: noesy1D\_da  
 Solvent: CDCl3  
 Ambient temperature  
 INOVA-600 "nb000"  
 Relax. delay 2.000 sec  
 Pulse 90.0 degrees  
 Mixing 0.400 sec  
 Acq time 1.892 sec  
 Width 8000.0 Hz  
 344 repetitions  
 OBSERVE H1, 599.9393058 MHz  
 DATA PROCESSING  
 FT size 32768  
 Total time 1 hr, 29 min, 28 sec

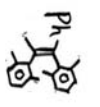

(23) NOE Experiment

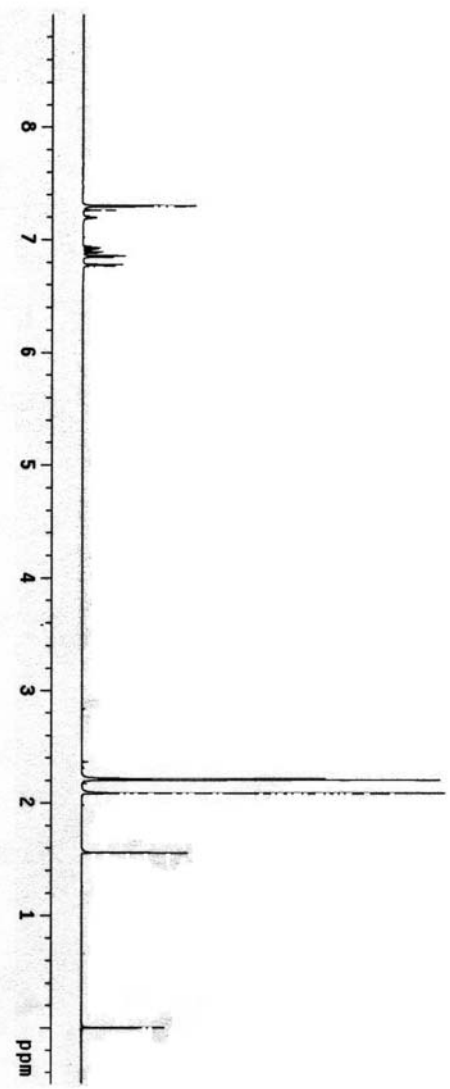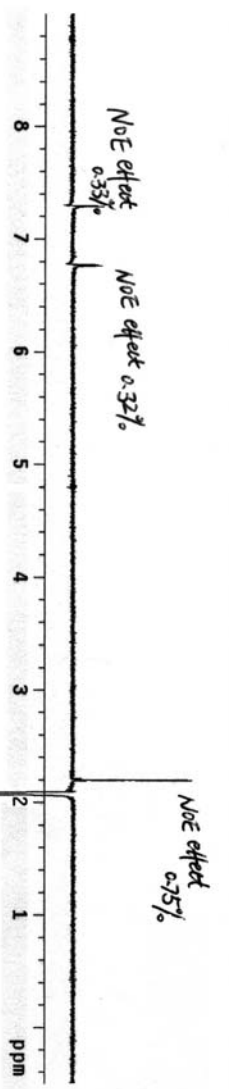

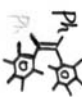

(24)

1H NMR

```

Dong_PIV_123_1H
exp1 s2pu1
SAMPLE
date Jun 23 2006 DEC. & VT 599.942
solvent CDC13 dn dpwr 30
file ACQUISITION exp dof 0
sfrq 599.942 dm mnm
tn 1.842 dmf1 n
nd 30272 dseq 200
sw 8000.0 dres 1.0
fb 4000 homo n
bs 4 dfrq2 DEC2 0
tpwr 58 dfrq3 0
pw 5.5 dn2 1
di 0 dpwr2 1
cof 0 ddf2 n
ct 18 ddm2 n
atlock n dmf2 200
gain not used dseq2 1.0
11 n homo2 n
1n n dfrq3 DEC3 0
dp Y dn3 1
ns DISPLAY nm dn3 0
SP -991.7 dof3 0
VP 7999.5 dm3 n
VE 88 dmf3 c
VC 0 dmf3 200
WC 250 dseq3 1.0
Hzmm 0.12 dres n
f1 473.13 HOMOPROCESSING
f2 392.6 wfile
f3 3.000 math
th 3 fn not used
ins 3 ft
nm ph 3.000 math wft
WEIR
WEXP
WOS
WNT

```

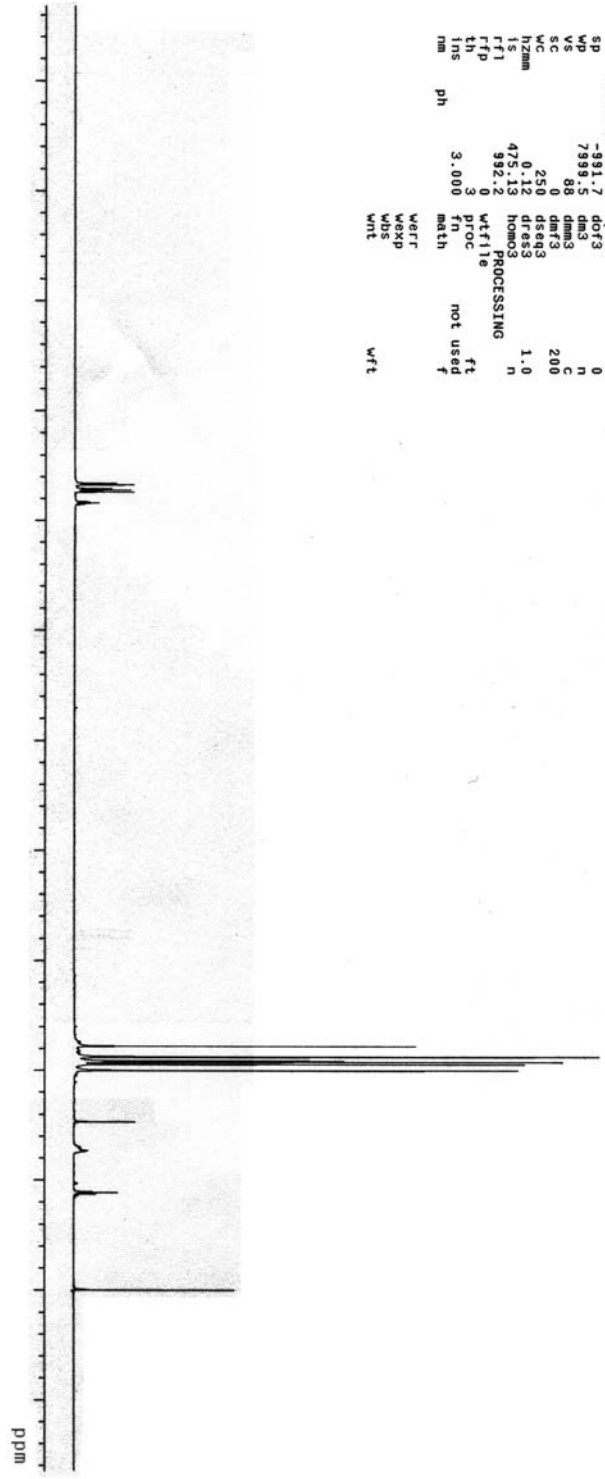



Dong\_PIV\_123\_moesy1D  
Pulse Sequence: moesy1D\_da  
Solvent: CDCl3  
Ambient temperature  
INOVA-600 "u600"  
Relax. delay 2.000 sec  
Pulse 90.0 degrees  
Mixing 0.400 sec  
Acq. time 1.892 sec  
Width 8000.0 Hz  
Spectral width  
Observed H1 599.9392939 MHz  
DATA PROCESSING  
FT size 32758  
Total time 1 hr, 24 min

(24) NOE

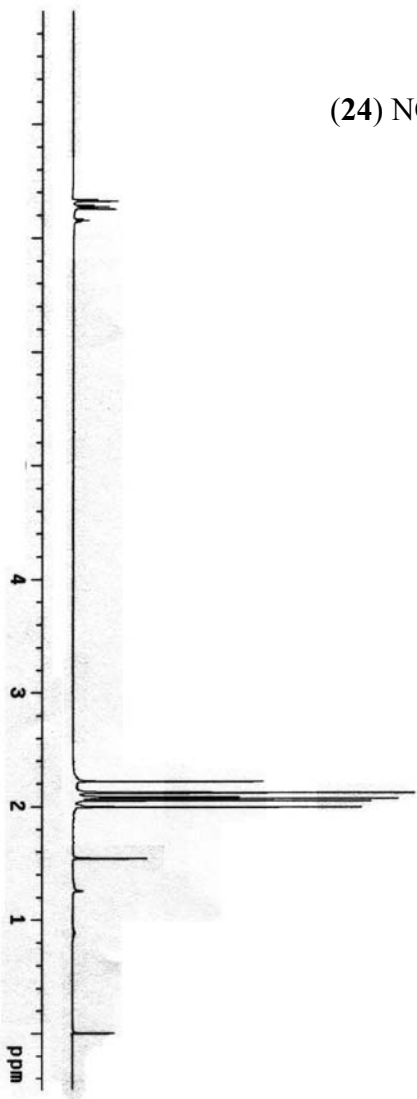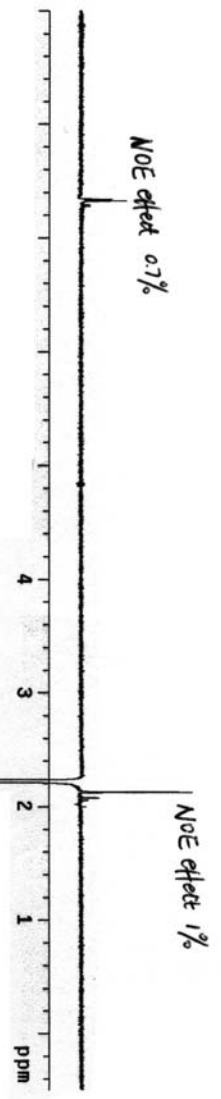

Supplement: NIHMS61791-supplement-si20061206_104.pdf [file NIHMS61791-supplement-si20061206_104.pdf]
